1 **Title**

2 Safety evaluation of soy leghemoglobin protein preparation derived from *Pichia pastoris*,

3 intended for use as a flavor catalyst in plant-based meat

4

5 **Running Head**

6 Safety of soy leghemoglobin protein preparation

7

8 **Authors**

9 Rachel Z. Fraser<sup>1\*</sup>, Mithila Shitut<sup>2</sup>, Puja Agrawal<sup>1</sup>, Odete Mendes<sup>2</sup>, and Sue Klapholz<sup>1</sup>

10

11 **Author Affiliations**

12 <sup>1</sup> Impossible Foods Inc., 525 Chesapeake Drive, Redwood City, CA, 94063, USA

13 <sup>2</sup> Product Safety Labs, 2394 County Road 130, Dayton, NJ 08810, USA

14 \*Correspondence to: Rachel Z. Fraser, Impossible Foods Inc., 525 Chesapeake Drive, Redwood

15 City, CA, 94063, USA. Email: [rachel.fraser@impossiblefoods.com](mailto:rachel.fraser@impossiblefoods.com) +1 650 461 4385

16 **Abstract**

17 The leghemoglobin protein (LegH) from soy (*Glycine max*) expressed in *Pichia pastoris* (LegH  
18 Prep) imparts a meat-like flavor profile onto plant-based food products. The safety of LegH Prep  
19 was evaluated through a series of *in vitro* and *in vivo* tests. The genotoxic potential of LegH Prep  
20 was assessed using the bacterial reverse mutation assay (Ames test) and the *in vitro* chromosome  
21 aberration test. LegH Prep was non-mutagenic and non-clastogenic in each test, respectively.  
22 Systemic and female reproductive toxicity were assessed in two separate 28-day dietary studies  
23 in Sprague Dawley rats. There were no mortalities associated with the administration of LegH  
24 Prep. There were no clinical observations, body weight, ophthalmological, clinical pathology, or  
25 histopathological changes attributable to LegH Prep administration. Female reproductive  
26 parameters were comparable between rats treated with LegH Prep and concurrent control rats.  
27 These studies establish an NOAEL of 750 mg/kg/day LegH, which is over 100 times greater than  
28 the 90<sup>th</sup> percentile estimated daily intake (EDI). Collectively, this work demonstrates that LegH  
29 Prep is safe for its intended use in ground beef analogue products at concentrations up to 0.8%  
30 LegH.

31

32 **Keywords**

33 Leghemoglobin

34 *Pichia pastoris*

35 Food product

36 Toxicology

37 Safety

## 38 **Abbreviations**

39 LegH: soy leghemoglobin protein

40 LegH Prep: soy leghemoglobin protein preparation derived from *Pichia pastoris*

41

## 42 **Introduction**

43 Western diets containing meat have a larger negative impact on the environment  
44 compared to plant-based diets.<sup>1-4</sup> However, due to both social and personal reasons, many  
45 consumers are resistant to reducing the amount of meat they eat.<sup>2,5,6</sup> To date, plant-based diets  
46 have been limited to small, motivated populations, such as consumers who follow vegetarian or  
47 vegan principles.<sup>7-9</sup> One potential way to catalyze widespread shift to more sustainable, plant-  
48 based diets is to create meat directly from plants that satisfies the tastes of meat consumers.<sup>7,8,10</sup>  
49 Achieving that goal would require products that recreate the sensory properties that people crave  
50 in meat, including texture, mouthfeel, taste, smell, and cooking experience, based on an  
51 understanding of the biochemical origins of meat sensory attributes.

52 An investigation of the molecular mechanisms underlying the unique flavors and aromas  
53 of meat led to the discovery that heme is the critical catalyst of the chemical reactions that  
54 transform simple biomolecules into the complex array of odorants and flavor molecules that  
55 define the characteristic flavor profile of meat.<sup>11</sup> Heme is an iron-containing porphyrin ring that  
56 exists as a protein co-factor in all branches of life and is essential for most biochemical processes  
57 involving molecular oxygen.<sup>12</sup> Myoglobin and hemoglobin proteins from animal meat tissues  
58 have been consumed throughout human history and represent an important source of dietary  
59 iron.<sup>13,14</sup> Plants contain symbiotic and non-symbiotic hemoglobin proteins, both of which share a  
60 common ancestor with animal hemoglobins.<sup>15</sup> Symbiotic plant hemoglobins, also known as  
61 leghemoglobins, are present in the root nodules of leguminous plants.<sup>16</sup> Leghemoglobin controls  
62 the oxygen concentration in the area surrounding symbiotic nitrogen-fixing bacteria.<sup>15-17</sup> Non-  
63 symbiotic plant hemoglobins are expressed in the stems, roots, cotyledon, and leaves and are  
64 involved in oxygen homeostasis pathways.<sup>18,19</sup> Due to the presence of non-symbiotic

65 hemoglobins in legumes, cereals, and other plants,<sup>12,15,20–22</sup> low levels of plant heme proteins are  
66 widely consumed in the human diet.<sup>23–25</sup>

67 Paralleling the catalytic activity of myoglobin in muscle meats, leghemoglobin protein  
68 (LegH) from soy (*Glycine max*) imparts meat-like flavors and aromas on to plant-based meat  
69 products.<sup>11</sup> While the primary amino acid sequence of LegH is highly divergent from the  
70 sequence of animal hemoglobins and myoglobins, the three dimensional structure is highly  
71 similar.<sup>26</sup> Additionally, the heme co-factor bound to LegH (heme B) is identical to heme found in  
72 animal meat, which has a long history of safe use in the human diet.<sup>14</sup> The iron from LegH has  
73 an equivalent bioavailability to iron from bovine hemoglobin when supplemented in a food  
74 matrix.<sup>27</sup> However, because soy root nodules, and thus LegH protein, are not commonly  
75 consumed in the human diet, the safety properties of LegH remain not fully understood.

76 In pursuit of the intended use in ground beef analogue products, the gene encoding a soy  
77 LegH protein was introduced into the genome of the yeast *Pichia pastoris*, enabling production  
78 of high levels of soy leghemoglobin protein preparation (LegH Prep). The total protein fraction  
79 of LegH Prep contains at least 65% LegH. The remaining proteins are from the *Pichia* host.  
80 *Pichia pastoris* is non-toxicogenic and non-pathogenic and has been used in the recombinant  
81 expression of both GRAS and FDA-approved proteins.<sup>28,29</sup> Here, we evaluated the safety of  
82 LegH Prep with both *in vitro* and *in vivo* models. To evaluate potential genotoxicity and  
83 carcinogenicity, a bacterial reverse mutation test (Ames test) and an *in vitro* chromosome  
84 aberration test were performed. These *in vitro* models showed that LegH Prep is neither  
85 mutagenic nor clastogenic. Systemic toxicity was evaluated by a 28-day feeding study in  
86 Sprague Dawley rats. An additional 28-day feeding study was performed to evaluate the female  
87 estrous cycle and reproductive health. These *in vivo* models demonstrated no adverse effects

88 attributable to the consumption of LegH Prep at the maximum dose tested, which was more than  
89 100 times greater than the 90<sup>th</sup> percentile estimated daily intake (EDI) in ground beef analogue  
90 products. Collectively, these results demonstrate that LegH Prep is safe for its intended use in  
91 ground beef analogue products.

92

## 93 **Materials and Methods**

### 94 *Test Article Production and Analysis*

95 LegH was recombinantly expressed in *Pichia pastoris* during submerged fed-batch  
96 fermentation and isolated using filtration-based recovery with food- or pharmaceutical-grade  
97 materials.<sup>30</sup> The *Pichia* production strain (MXY0291) is derived from a non-toxigenic and non-  
98 pathogenic, well-characterized strain lineage that has a history of safe use in manufacturing  
99 proteins for use in food and pharmaceuticals.<sup>28,29,31</sup> This process is compliant with the Enzyme  
100 Technical Association's guidelines for fermentation-produced microbiologically-derived proteins  
101 and follows current Good Manufacturing Practices (cGMP).<sup>32,33</sup> LegH Prep is a frozen liquid and  
102 the entire final preparation was used for all *in vitro* safety tests performed in this study. To aid  
103 with homogeneous mixing into the animal diet, LegH Prep was freeze-dried prior to use for all *in*  
104 *vivo* studies.

105 During each of the *in vivo* studies described below, the LegH concentrations within the  
106 neat test substance and animal feed samples were analyzed by high performance liquid  
107 chromatography (HPLC) to evaluate test article concentration, stability, and homogeneity. LegH  
108 Prep was extracted from the feed by adding 50 mM potassium phosphate pH 7.4, 150 mM  
109 sodium chloride to each feed sample followed by 1 hour of end-over-end rotation. HPLC was  
110 performed using an Agilent 1100 Series instrument with an ACQUITY xBridge BEH125 SEC

111 7.8 x 150 mm ID 3.5  $\mu$ m column (Waters). LegH concentration was determined by integration of  
112 the 415 nm absorbance at the LegH retention time.

113

#### 114 ***Estimated daily intake (EDI)***

115 Ground beef analogue products will be formulated to contain approximately the same  
116 amount of heme as beef. This equates to a typical and maximum usage rate of 0.6% and 0.8%  
117 LegH. The EDI for LegH within ground beef analogue products was calculated based on 100%  
118 capture of the U.S. ground beef market, which is approximately 500 times higher than the market  
119 size for all meat and poultry analogue products.<sup>a</sup> The national mean daily consumption of ground  
120 beef for males and females ages 2 and over is 25 grams per day (59 g beef/person/day \* 42% of  
121 beef sales are ground beef).<sup>34,35</sup> Replacement of ground beef with ground beef analogue on a 1-  
122 for-1 basis would result in typical (0.6% LegH use rate) and maximum (0.8% LegH use rate)  
123 LegH EDIs of 150 and 200 mg/person/day, respectively. In accordance with FDA guidelines, the  
124 90<sup>th</sup> percentile EDI was calculated as two times the maximum EDI or 400 mg/person/day LegH,  
125 which corresponds to 6.67 mg/kg bodyweight/day assuming an average body weight of 60 kg.  
126 The 90<sup>th</sup> percentile was used as a basis for safety testing.

127

#### 128 ***Bacterial Reverse Mutation Assay (Ames Test)***

129 The Ames test (reverse mutation test)<sup>38</sup> was performed by Product Safety Labs (PSL)  
130 (Dayton, NJ) and was conducted in accordance with U.S. Food and Drug Administration GLP  
131 regulations (21 CFR Part 58), and the OECD Principles of GLP ENV/MC/CHEM(98)17.<sup>39</sup> The  
132 assay design was based on OECD Guideline 471<sup>40</sup> and ICH Guidelines S2A and S2B.<sup>41</sup> Five

---

<sup>a</sup> Datamonitor estimates the US meat analogue volume was 53M kg in 2009



133 bacterial strains were evaluated (*Salmonella typhimurium* (ST) TA98, TA100, TA1535 and  
134 TA1537 and *Escherichia coli* (EC) WP2uvrA (Molecular Toxicology, Inc., Boone, NC))  
135 according to the plate incorporation and pre-incubation methods in both the presence and  
136 absence of a metabolic activation system (S9 mix). Sterile water served as the negative control,  
137 while five mutagens including sodium azide (NaN<sub>3</sub>), ICR 191 acridine, daunomycin, methyl  
138 methanesulfonate (MMS) and 2-aminoanthracene (2-AA) (Molecular Toxicology, Inc., Boone,  
139 NC) were used as the positive controls. Water was also used as the solvent for the positive  
140 controls except for 2-AA which was prepared in dimethyl sulfoxide (DMSO). The initial test  
141 followed the plate incorporation method, in which the following materials were mixed and  
142 poured over the surface of a minimal agar plate: 100 µL of the prepared test solutions, negative  
143 (vehicle) control, or prepared positive control substance; 500 µL S9 mix or substitution buffer;  
144 100 µL bacteria suspension (ST or EC); and 2000 µL overlay agar maintained at approximately  
145 45 °C.

146 Plates were prepared in triplicate and uniquely identified. Appropriate sterility control  
147 check plates (treated with critical components in the absence of bacteria) were included as a  
148 standard procedural check. After pouring, plates were placed on a level surface until the agar  
149 gelled, then inverted and incubated at  $37 \pm 2$  °C until growth was adequate for enumeration  
150 (approximately  $65 \pm 3$  hours).

151 The confirmatory test employed the pre-incubation modification of the plate  
152 incorporation test. The test or control substances, bacteria suspension, and S9 (or substitution  
153 buffer) were incubated under agitation for approximately 30 minutes at approximately  $37 \pm 2$  °C  
154 prior to mixing with the overlay agar and pouring onto the minimal agar plates before proceeding  
155 as described for the initial test. Following incubation, the revertant colonies were counted

156 manually and/or with the aid of a plate counter (Colony Plate Reader: Model Colony-Doc-It™).  
157 To be considered valid, the background lawn for vehicle control plates had to appear slightly  
158 hazy with abundant microscopic non-revertant bacterial colonies. The mean revertant colony  
159 counts for each strain treated with the vehicle had to lie close to or within the expected range  
160 taking into account the laboratory historical control range. For each experimental point, the  
161 Mutation Factor (MF) was calculated by dividing the mean revertant colony count by the mean  
162 revertant colony count for the corresponding concurrent vehicle control group. The results were  
163 considered to be positive when the MF was increased at least by a factor of two for strains TA98,  
164 TA100 and WP2 uvrA or by at least a factor of three for strains TA1535 and TA1537. In  
165 addition, any increases had to be dose-related and/or reproducible, i.e., increases must be  
166 obtained at more than one experimental point (at least one strain, more than one dose level, more  
167 than one occasion or with different methodologies).

168

### 169 ***Chromosome Aberration Assay in Human Peripheral Blood Lymphocytes (HPBL)***

170 The chromosomal aberration assay<sup>42</sup> was conducted at Eurofins Biopharma (Munich,  
171 Germany) in compliance with the German GLP regulations according to 19b Abs. 1  
172 chemikaliengesetz<sup>43</sup> and the protocol procedures described in the Term Tests for Genetic  
173 Toxicity and OECD 473, *In Vitro* Mammalian Chromosome Aberration Test<sup>39,44</sup> and the  
174 European Commission Regulation (EC) No.440/2008 B.10.<sup>45</sup> The study was conducted using  
175 human peripheral blood lymphocytes (HPBL) in both the absence and presence of the  
176 chemically-induced rat liver S9 metabolic activation system (Trinova Biochem, Giessen,  
177 Germany). Peripheral blood lymphocytes were obtained from healthy non-smoking donors who  
178 had no recent history of exposure to genotoxic chemicals and radiation. Peripheral blood

179 lymphocytes were cultured in complete medium (RPMI-1640 containing 15% heat inactivated  
180 fetal bovine serum, 0.24 g/mL of phytohemagglutinin and 100 units penicillin and 100 µg/mL  
181 streptomycin). The cultures were incubated under standard conditions (37 °C in a humidified  
182 atmosphere of 5% CO<sub>2</sub> in air) for 48 hours. The cells were treated for periods of 4 or 24 hours in  
183 the non-activated test system and for a period of 4 hours in the S9-activated test system. All cells  
184 were harvested 24 hours after treatment initiation. Cyclophosphamide and ethylmethanesulfonate  
185 (Sigma-Aldrich, MO) were evaluated as the concurrent positive controls for treatments with and  
186 without S9, respectively.

187 In addition to the mitotic index determination, the proliferation index of selected samples  
188 (negative control and high doses of LegH Prep) was calculated using the BrdU (5-bromo-2'-  
189 deoxyuridine) technique. The proliferation index was calculated using Equation 1 (where M1 is  
190 the first generation, M2 is the second generation, and M3 is the third generation) based on the  
191 number of cell divisions undertaken during the experiment.

192

$$193 \quad PI = \frac{1(\% \text{ cells in } M1) + 2(\% \text{ cells in } M2) + (\% \text{ cells in } M3)}{100} \quad (1)$$

194

#### 195 ***14-Day Dietary Palatability and Range Finding Study in Rats***

196 This study<sup>46</sup> was conducted at PSL (Dayton, NJ) following the OECD 407 Guidelines for  
197 Testing of Chemicals<sup>47</sup> and Food Ingredients and U.S. FDA Toxicological Principles for the  
198 Safety Assessment of Food Ingredients IV.C.4.a<sup>48</sup> and was approved by the Institutional Animal  
199 Care and Use Committees (IACUC) of PSL. PSL is AAALAC (Association for Assessment and  
200 Accreditation of Laboratory Animal Care) accredited and certified in the appropriate care of all  
201 live experimental animals and maintains current staff training ensuring animals were handled

202 humanely during the experimental phase of this study in compliance with the National Research  
203 Council's 2011 Guide for the Care and Use of Laboratory Animals (8<sup>th</sup> ed.).<sup>49</sup> CRL Sprague-  
204 Dawley CD® IGS rats were purchased from Charles River Laboratories (Kingston, NY) and  
205 subsequently quarantined and acclimated to the PSL facilities. Animals were maintained in a  
206 temperature- and humidity-controlled room at 19-22 °C and 41-65%, respectively, under a 12  
207 hour light–dark cycle, and fed a standard Envigo Teklad Global 16% Protein Rodent Diet®  
208 #2016 (Envigo Laboratories, Inc., Indianapolis, IN). The diet and filtered tap water were  
209 supplied *ad libitum*. The animals were group housed and received enrichment activities such as  
210 chew sticks throughout the duration of the study. Forty-eight animals were selected for the test  
211 (7-8 weeks of age at dosing; weighing 230-264g (males) and 158-181g (females)) and distributed  
212 into four groups with 6 males and 6 females each (1 control group per sex and 3 dietary levels  
213 per sex). The freeze-dried LegH Prep was administered in the diet. The animals were observed  
214 daily for viability, signs of gross toxicity, and behavioral changes at least once daily during the  
215 study, and weekly for a battery of detailed observations. Body weights were recorded two times  
216 during the acclimation period (including prior to dosing on study day 1) and on study days 3, 7,  
217 10, and 14. Individual food consumption was also recorded to coincide with body weight  
218 measurements. Food efficiency was calculated by dividing the mean daily body weight gain by  
219 the mean daily food consumption. The animals were fasted overnight prior to blood collection.  
220 Samples were collected from all animals for hematology evaluation via the inferior vena cava  
221 under isoflurane anesthesia during the necropsy procedure. Approximately 500 µL of blood were  
222 collected in a pre-calibrated tube containing K<sub>2</sub>EDTA. All clinical pathology samples were sent  
223 to DuPont Haskell Global Centers for Health and Environmental Sciences (Newark, DE) for  
224 analysis. Gross necropsy was performed on study day 15 and the animals were evaluated for any

225 macroscopic changes. Histological examination was performed on the liver, spleen, and bone  
226 marrow of the animals from the vehicle control and high dose (groups 1, and 4, respectively).  
227 Slide preparation was performed by Histo-Scientific Research Laboratories (HSRL) (Mount  
228 Jackson, VA) and histopathological assessment was performed by a Board Certified Veterinary  
229 Pathologist at PSL.

230

### 231 ***28-Day Dietary Feeding Study in Rats***

232 This 28-day feeding study<sup>50</sup> was conducted at PSL (Dayton, NJ) in accordance with GLP  
233 and follows OECD Guidelines for Testing of Chemicals, Section 4 Health Effects (Part 408):  
234 Repeated Dose 90-day Oral Toxicity Study in Rodents<sup>39,51</sup> and the U.S. FDA Toxicological  
235 Principles for the Safety Assessment of Food Ingredients, IV.C.4.a.<sup>48</sup> and was approved by the  
236 IACUC of PSL. Adult CRL Sprague-Dawley CD® IGS rats were purchased from Charles River  
237 Laboratories (Kingston, NY) and subsequently quarantined and acclimated to the PSL facilities  
238 as described above. Eighty rats were selected for testing, using acceptance criteria described  
239 above, and distributed into four groups with 10 males and 10 females per group (1 control group  
240 per sex and 3 dietary dose levels per sex). The freeze-dried LegH Prep was administered in the  
241 diet.

242 Prior to study initiation and again on study day 23, the eyes of all rats were examined by  
243 focal illumination and indirect ophthalmoscopy. Clinical observations, food consumption, body  
244 weight, and food efficiency were evaluated as described above. On study day 22, samples were  
245 collected from all animals for hematology, serum chemistry and urinalysis evaluation. Blood  
246 samples for hematology and serum chemistry were collected via sublingual bleeding under  
247 isoflurane anesthesia. Approximately 500  $\mu$ L of blood were collected in a pre-calibrated tube

248 containing K<sub>2</sub>EDTA for hematology assessments. The whole blood samples were stored under  
249 refrigeration and shipped on cold packs. Approximately 1000 µL of blood were collected into a  
250 tube containing no preservative for serum chemistry assessments. At terminal sacrifice, all  
251 animals were euthanized by exsanguination from the abdominal aorta under isoflurane anesthesia  
252 and blood was collected for evaluation of coagulation parameters. All clinical pathology samples  
253 were sent to DuPont Haskell Global Centers for Health and Environmental Sciences (Newark,  
254 DE) for analysis. All animals in the study were subjected to a full necropsy, which included  
255 examination of the external surface of the body, all orifices, and the thoracic, abdominal and  
256 cranial cavities and their contents. Tissues/organs representing systems were collected and  
257 preserved in 10% Neutral Buffered Formalin with the exception of the eyes, testes and  
258 epididymides, which were preserved in Davidson's fixative before transfer to ethanol. A subset  
259 of tissues/organs were weighed wet as soon as possible after dissection to avoid drying  
260 including: adrenal glands, kidneys, spleen, brain, liver, thymus, testes, epididymides, ovaries  
261 with oviducts, uterus, and heart. The fixed tissues were trimmed, processed, embedded in  
262 paraffin, sectioned with a microtome, placed on glass microscope slides, stained with  
263 hematoxylin and eosin, and examined by light microscopy. Histological examination was  
264 performed on the preserved organs and tissues of the animals from the vehicle control and high  
265 dose groups (Groups 1, and 4, respectively), with the exception of the female reproductive  
266 organs, which were evaluated for all dose levels. Slide preparation and histopathological  
267 assessment was performed by a Board Certified Veterinary Pathologist at Histo-Scientific  
268 Research Laboratories (HSRL) (Mount Jackson, VA). A pathology peer review was performed  
269 by a Board Certified Veterinary Pathologist at Regan Path/Tox Services (Ashland, OH) for all  
270 female reproductive tissues.

271

272 ***28-Day Investigative Study with a 14-Day Pre-Dosing Estrous Cycle Determination***

273 A study was conducted at PSL (Dayton, NJ)<sup>52</sup> and the protocol was approved by the  
274 IACUC of PSL. Adult CRL Sprague-Dawley CD® IGS female rats were purchased from  
275 Charles River Laboratories and subsequently quarantined and acclimated at the PSL facilities as  
276 described above. Sixty rats were selected for testing using the acceptance criteria described  
277 above and animals were distributed into four groups with 15 females per group (1 control group  
278 per sex and 3 dietary dose levels per sex). Freeze dried LegH Prep was administered in the diet.  
279 The estrus cycle was evaluated daily by vaginal cytology for a period of 14 days prior to  
280 administration of the test substance and for the last two weeks of the 28-day period of test  
281 substance administration. Estrous cycle stage was not evaluated for the first two weeks of the  
282 dosing period to avoid over-manipulating the animals. For each 14-day period, average estrus  
283 cycle length was calculated for each animal and subsequently each group. Clinical observations,  
284 food consumption, body weight, and food efficiency were evaluated as described above. All  
285 animals were subjected to a full necropsy, which included examination of the external surface of  
286 the body, all orifices, and the thoracic, abdominal and cranial cavities and their contents. Female  
287 reproductive organs were collected and preserved in 10% Neutral Buffered Formalin. The  
288 ovaries with oviducts and uterus were weighed wet as soon as possible after dissection to avoid  
289 drying. Reproductive tissues were fixed and examined as described above. Estrous cycle stage  
290 was recorded for all animals. Histological examination was performed on the preserved organs  
291 and tissues for group 1 and group 4 animals. Slide preparation was performed by Histoserv Inc.  
292 (Germantown, MD) and histopathological assessment was performed by a Board Certified  
293 Veterinary Pathologist at Regan Path/Tox Services (Ashland, OH).

294

295 *Statistical Analyses*

296 Mean and standard deviations were calculated for all quantitative data. For the  
297 Chromosome Aberration Study<sup>42</sup>, the Fisher's exact test was used to compare the induction of  
298 chromosome aberrations in treated cultures and solvent control. Significance was judged at a  
299 probability value of  $p < 0.05$ . Male and female rats were evaluated separately. Body weights, food  
300 consumption, urine volume, hematology, blood chemistry, and absolute and relative organ  
301 weights, averages and standard deviations were calculated, and analyzed by Bartlett's test for  
302 homogeneity of variances and normality.<sup>53</sup> Where Bartlett's test indicated homogeneous  
303 variances, treated and control groups were compared using a one-way analysis of variance  
304 (ANOVA). When ANOVA was significant, a comparison of the treated groups to control by  
305 Dunnett's test for multiple comparisons was performed.<sup>54,55</sup> Where variances were considered  
306 significantly different by Bartlett's test, groups were compared using a non-parametric method  
307 (Kruskal-Wallis non-parametric analysis of variance).<sup>56</sup> When non-parametric analysis of  
308 variance was significant, comparison of treated groups to control was performed using Dunn's  
309 test.<sup>57</sup> Statistical analysis was performed on all quantitative data for in-life and organ weight  
310 parameters using Provantis™ Version 8, Tables and Statistics, Instem LSS, Staffordshire UK.  
311 Clinical pathology was preliminarily tested via Levene's test<sup>58</sup> for homogeneity and via Shapiro-  
312 Wilk test<sup>59</sup> for normalcy followed by ANOVA followed with Dunnett's test.<sup>54,55</sup>

313



## 314 **Results**

### 315 ***Bacterial Reverse Mutation Assay (Ames Test)***

316 The objective of this test was to determine the mutagenic potential of LegH Prep using  
317 histidine-requiring strains of *S. typhimurium* (TA98, TA100, TA1535 and TA1537) and a  
318 tryptophan-requiring strain of *E. coli* (WP2 uvrA). LegH Prep was evaluated with and without an  
319 exogenous metabolic activation (S9 mix) at levels of 23.384, 74, 233.84, 740, 2338.4, 7400,  
320 23,384 and 74,000 µg/plate, which corresponded to 1.58, 5.0, 15.8, 50, 158, 500, 1580, and 5000  
321 µg/plate of the characterizing component, LegH, with the high level being the standard limit for  
322 this test.

323 The mean revertant colony counts for each strain treated with the vehicle were close to or  
324 within the expected range, considering the laboratory historical control range and/or published  
325 values.<sup>60,61</sup> The positive control substances caused the expected substantial increases in revertant  
326 colony counts in both the absence and presence of S9 in each phase of the test, confirming the  
327 sensitivity of the test and the activity of the S9 mix (Table 1). No signs of precipitation or  
328 contamination were noted throughout the study. Therefore, each phase of the test is considered  
329 valid.

330 LegH Prep did not cause a positive increase in the mean number of revertant colonies per  
331 plate with strains TA1535, TA1537, TA98, TA100 or WP2 uvrA in either the absence or  
332 presence of S9 when using either the plate incorporation or the pre-incubation method (Table 1).  
333 Therefore, LegH Prep was non-mutagenic in the bacterial reverse mutation assay.

334

335 ***Chromosome Aberration Assay in Human Peripheral Blood Lymphocytes (HPBL)***

336 The objective of this *in vitro* assay was to evaluate the ability of LegH Prep to induce  
337 structural or numerical (polyploid or endoreduplicated) chromosome aberrations in HPBL.  
338 HPBL cells were exposed to LegH Prep for 4 hours in the presence or absence of S9  
339 (Experiment 1) or for 24 hours in the absence of S9 (Experiment 2). In each experiment,  
340 untreated and positive controls values were within the historical control range indicating that the  
341 subject assay met the criteria for a valid test.

342 In accordance with OECD guidelines, Experiment 1 used the recommended  
343 concentrations of 100-5000  $\mu\text{g/mL}$  LegH, which corresponded to 148-74,000  $\mu\text{g/mL}$  LegH Prep.  
344 Mitotic index was evaluated first since decreased mitotic index can inhibit the ability to evaluate  
345 chromosome aberrations. Although the mitotic index decreased to below 70% of the negative  
346 control at high concentrations of LegH Prep without S9 metabolic activation, no such decrease in  
347 the mitotic index was observed in the presence of S9 metabolic activation (Table 2). No  
348 significant difference in the proliferation index was observed in either condition (Table 3).  
349 Evaluation of chromosomal aberration tests using the mitotic index can be unreliable.<sup>62</sup>  
350 However, in all cases, the mitotic index remained above the 45% of control threshold that is  
351 recommended for evaluation of structural and numerical chromosomal aberrations and no test  
352 article precipitation was observed. In Experiment 1, no significant increase in cells with  
353 structural or numerical chromosome aberrations was observed up to 5000  $\mu\text{g/mL}$  LegH, which  
354 was the maximum dose tested, both with and without S9 (Table 2).

355 The increased incubation time of Experiment 2 resulted in precipitation of the test article  
356 at concentrations of greater than or equal to 500  $\mu\text{g/mL}$  LegH. Additionally, the mitotic index  
357 values relative to the control decreased below the 45% percent threshold at concentrations

358 greater than 1000 µg/mL LegH. Therefore, only concentrations up to 1000 µg/mL LegH were  
359 evaluated for chromosome aberrations. The proliferation index values for 500 and 1000  
360 micrograms/plate were 1.23 (79% relative to control) and 1.12 (72% relative to control),  
361 respectively (Table 3). This decrease was not a consequence of chromosome aberrations. In  
362 Experiment 2, no significant increase in cells with structural or numerical chromosome  
363 aberrations was observed up to 1000 µg/mL LegH, which was the maximum dose evaluated,  
364 without metabolic activation (Table 2).

365 These results indicate that LegH Prep does not induce structural or numerical  
366 chromosome aberrations in either the non-activated or the S9-activated test system. Therefore,  
367 LegH Prep is considered non-clastogenic in the *in vitro* mammalian chromosome aberration test  
368 using HPBL.

369

### 370 ***Animal Feed Analytical Chemistry***

371 In each of the *in vivo* studies described below, the dietary preparations were analyzed  
372 using HPLC to evaluate test article (freeze-dried LegH Prep) homogeneity, stability, and  
373 concentration verification. In each case, the analyte fell within acceptable parameters: < 10%  
374 RSD of LegH concentration between samples of the feed collected from top, middle, and bottom  
375 of the mixer, indicating homogeneous distribution; < 10% change in LegH concentration during  
376 diet presentation, indicating stability; and within 10% of the target concentration of LegH,  
377 indicating accurate dosing.

378

### 379 ***14-Day Dietary Palatability and Range Finding Study in Rats***

380 A 14-day toxicology and palatability feeding study in rats<sup>46</sup> was performed to assess the  
381 feasibility of oral administration of freeze-dried LegH Prep in the diet and to establish the dose  
382 range for the subsequent 28-day study. The test article was administered in doses of 0, 3156,  
383 6312, and 12,612 ppm (Groups 1-4, respectively) corresponding to active ingredient LegH  
384 concentrations of 0, 125, 250 and 500 mg/kg/day. The calculated nominal dietary intake levels  
385 were 134, 269, and 531 mg/kg/day for Group 2-4 male rats and 148, 296, and 592 mg/kg/day for  
386 Group 2-4 female rats. The animals are considered to have received acceptable dose levels.

387 *Mortality, Clinical Signs, Body Weight/Food Consumption*

388 There were no mortalities during the course of the 14-day study. There were no clinical  
389 observations attributed to administration of LegH Prep. In-life clinical signs included reported  
390 discoloration of the urine in 6/6 Group 4 males and 5/6 Group 4 females on day 5. Due to its  
391 single day occurrence, this observation is likely due to re-hydration of the test article by animal  
392 urine, which would result in the formation of a red/brown color. Without a correlation to clinical  
393 hematology or any other parameter, these findings are interpreted to be of no toxicological  
394 significance. There were no changes in mean food consumption, mean food efficiency, mean  
395 body weight, and mean daily body weight gain attributable to the administration of LegH Prep.

396 *Pathology*

397 There were no changes in hematology values attributable to the administration of LegH  
398 Prep. There were no LegH Prep-related macroscopic or microscopic findings. Mean absolute and  
399 relative organ-to-body weights for Group 2-4 were comparable to control group 1 throughout the  
400 study. These results suggest that LegH Prep would be well tolerated in a study of longer  
401 duration.

402

403            ***28-Day Dietary Feeding Study in Rats***

404            A 28-day dietary feeding study in rats was performed to evaluate the potential subchronic  
405 toxicity of LegH Prep following continuous exposure of the test substance in the diet. A no  
406 observed adverse effect level (NOAEL) was sought for each sex. Due to the successful  
407 palatability of 500 mg/kg/day LegH in the previous 14-day feeding study, the maximum dose  
408 was increased to 750 mg/kg/day LegH. Administered doses of 0, 512, 1024 and 1536 mg/kg/day  
409 of freeze-dried LegH Prep corresponded to 0, 250, 500 and 750 mg/kg/day of LegH,  
410 respectively. The slight difference between in correlation between LegH Prep dose levels and  
411 LegH concentrations compared to the previous 14-day study are due to the utilization of a  
412 different lot of freeze-dried LegH Prep test article. The mean overall daily intake of the test  
413 substance in Group 2-4 male rats was 234, 466, and 702 mg/kg/day LegH. The mean overall  
414 daily intake in Group 2-4 female rats was 243, 480, and 718 mg/kg/day LegH. The animals are  
415 considered to have received acceptable dose levels.

416            *Mortality, clinical signs, body weight/food consumption*

417            No mortalities were observed during this study. There were no clinical  
418 observations attributable to the administration of LegH Prep. There were no body weight, body  
419 weight gain, food consumption, or food efficiency findings considered attributable to LegH Prep  
420 administration (Tables 4-6). A statistically significant decrease ( $p < 0.01$ ) in mean daily body  
421 weight gain was observed in group 2 females on days 14-21 (Table 4). This decrease was  
422 transient and was interpreted to have no toxicological relevance. Statistically significant  
423 increases ( $p < 0.05-0.01$ ) were observed for mean daily food consumption in Group 3 males on  
424 days 7-14 and in Group 4 males on days 7-10, that were transient and without significant impact  
425 on body weight, and were interpreted to be non-toxicologically relevant (Table 5). Mean food

426 efficiency for the treated female rats in Group 2-4 was generally comparable to the control  
427 Group 1 values throughout the study, with the exception of statistically significant increases ( $p <$   
428 0.01) in Group 2 on Days 14-21 that were transient and without significant impact on body  
429 weight and were interpreted to be non-toxicologically relevant. These small but significant  
430 changes were all considered to be non-toxicologically relevant and non-test article dependent.

#### 431 *Pathology*

432 There were to no test-substance-related changes in hematology parameters for male or  
433 rats (Table 7). Statically significant increase in red blood cell, hematocrit, and hemoglobin values  
434 and absolute basophil counts for Group 2 females and decreased absolute reticulocyte counts in  
435 Group 3 females were non-dose dependent and were interpreted to be within the expected  
436 biological variation and therefore not toxicologically relevant and not test article dependent  
437 (Table 7). There were no test-substance-related changes in coagulation parameters for female  
438 rats. A non-dose dependent increase in activated partial thromboplastin time (APPT) was  
439 observed in Group 3 and 4 males. Due to its very slight magnitude and lack of correlating  
440 pathological or clinical finding, this change is considered non-adverse. There were no test-  
441 substance-related changes in serum chemistry parameters for male rats (Table 8). Alkaline  
442 phosphatase (ALKP) was minimally decreased in a non-dose-dependent manner for Group 2 and  
443 Group 4 females (Table 8). This minimal decrease was not correlated with concurrent clinical  
444 pathology or histopathology changes and due to its limited clinical relevance is interpreted to  
445 have no toxicological significance and was not test-article dependent. Other differences in serum  
446 chemistry parameters that were statistically significant consisted of increased albumin and  
447 potassium values in Group 3 males, decreased glucose and chloride in Groups 2 and 3 females,  
448 increased globulin values in Group 3 females and increased calcium in Groups 2 and 3 females.

449 These were generally of small magnitude, lacked a response in a dose-dependent manner and are  
450 interpreted to be within expected biological variation and considered to be of no toxicological  
451 relevance and non-test-article-dependent. There were no test-substance-related changes in  
452 urinalysis parameters for males or female rats. (Table 9)

453 There were no test-article-dependent effects observed during necropsy, organ weights,  
454 macroscopic evaluation and microscopic evaluation in male and female rats, with a single  
455 exception of a distinct estrous cycle stage distribution in the female rats. The estrous cycle  
456 consists of four stages: proestrus, estrus, metestrus, and diestrus. Each stage has characteristic  
457 reproductive organ weights and pathology. At study termination, Group 2 and 4 females had an  
458 increased incidence of metestrus and a decreased incidence of estrus compared to Groups 1 and  
459 3. Consistent with the estrous cycle stage distribution, Group 2 and 4 females also had decreased  
460 presence of fluid-filled uteri and dilated uterine lumens and decreased uterine weights compared  
461 to Group 1 and 3 females (Table 10-11). These decreases did not correlate with adverse  
462 histopathological findings and are therefore interpreted to be non-adverse. The presence of both  
463 new and old ovarian corpora lutea in females from all groups indicated that all females were  
464 cycling normally. All other microscopic findings at the study day 29/30 time point were also  
465 unrelated to administration of LegH Prep and can be observed in the age and strain of rats used  
466 in this study.<sup>63,64</sup> Although the differences in estrous cycle stage distribution between groups was  
467 likely due sampling and assessing estrous cycle distribution on a single day, rather than using a  
468 longitudinal study, a more extensive and rigorous longitudinal study was performed focusing on  
469 the potential effect of LegH Prep on the estrous cycle.

470 ***28-Day Investigative Study in Rats with a 14-Day Pre-Dosing Estrous Cycle Determination***

471 A 28-day dietary feeding study was performed with female rats to thoroughly evaluate  
472 the estrous cycle stage distributions observed in the previous 28-day dietary feeding study. To  
473 ensure all animals had normal estrous cyclicity prior to the 28-day dosing phase, estrous cycle  
474 stage was determined daily for all animals for 14 days. Additionally, estrous cycle stage was  
475 determined for all animals for the last 14 days of the 28-day dosing period. At study termination,  
476 reproductive organs were analyzed. Administered doses of 0, 512, 1024 and 1536 mg/kg/day of  
477 freeze-dried LegH Prep correspond to 0, 250, 500 and 750 mg/kg/day of LegH, respectively. The  
478 mean overall daily intake of the test substance in Group 2, 3 and 4 female rats was 250, 496, and  
479 738 mg/kg/day LegH, respectively. The animals are considered to have received acceptable dose  
480 levels.

481 *Mortality, clinical signs, body weight/food consumption*

482 No mortalities were observed during this study. There were no clinical observations  
483 attributable to the administration of LegH Prep. There were no body weight, body weight gain,  
484 food consumption, or food efficiency findings considered attributable to LegH Prep  
485 administration with the exception of a single incidental increase ( $p < 0.05$ ) in mean daily body  
486 weight, mean food consumption and mean food efficiency for Group 2 animals on days 21-28.  
487 This increase was transient, non-dose-dependent, and interpreted to have no toxicological  
488 relevance.

489 *Estrous cycle evaluation and Pathology*

490 There were no test-substance-related changes in average estrus length attributable to  
491 LegH Prep administration (Table 12). There were no macroscopic or microscopic findings  
492 related to the administration of LegH Prep. A single Group 2 animal had prolonged estrus based  
493 on morphology of the ovaries (large atretic follicles, multiple corpus lutea at a similar state of



494 atresia) and presence of squamous metaplasia of the uterus. These findings were considered  
495 spontaneous and incidental due to the lack of similar findings at higher dose levels. One Group 1  
496 animal had large atretic follicles observed in both ovaries, and one Group 4 animal had lutenized  
497 follicles (follicles with evidence of lutenization in the wall but which have not ovulated) in both  
498 ovaries. Both of these observations are reported as background findings in rats of the strain and  
499 age used in this study<sup>65</sup> and were considered incidental because of their singular occurrences.  
500 There were no test-substance-related changes in absolute or relative reproductive organ weight  
501 values in female rats treated with LegH Prep (Table 13). Longitudinal daily monitoring of  
502 estrous cycle stage demonstrated that, despite intrinsically normal estrous cycles, the distribution  
503 of estrous cycle stages on any given day can be markedly different from the within-rat  
504 distribution over time (Figure 1).

505

#### 506 *Pathology Peer Review*

507 Because there were no test-article-dependent effects observed in the estrous cycle study,  
508 a pathology peer review was performed on the initial 28-day dietary feeding study. The review  
509 pathologist evaluated histopathology in all female reproductive organs and corresponding  
510 macroscopic and microscopic observations noted by the study pathologist. Following the peer  
511 review, the study pathologist and review pathologist reached a consensus that there were no test-  
512 article-dependent effects on the female estrous cycle and reproductive organs.

513

#### 514 **Discussion**

515 Heme is ubiquitous in the human diet and has been consumed for thousands of years.  
516 Replacing the myoglobin that catalyzes the unique flavor chemistry of meat derived from

517 animals with LegH from soy opens an opportunity to develop plant-based meats that deliver to  
518 consumers the pleasure they demand from animal-derived meats, with a small fraction of the  
519 environmental impact. To evaluate the safety profile of soy leghemoglobin produced in *Pichia*,  
520 we conducted a series of *in vitro* and *in vivo* studies.

521         The *Pichia*-derived LegH Prep was non-mutagenic in the bacterial reverse mutation test,  
522 which evaluated five strains of bacteria and eight different concentrations of LegH Prep up to a  
523 maximum dose of 5000 µg LegH/plate. Similarly, LegH Prep was non-clastogenic in the  
524 chromosomal aberration test, which evaluated chromosomal rearrangements in HPBL following  
525 4 hr (with and without metabolic activation) and 24 hr (without metabolic activation) incubations  
526 with LegH Prep. These assays tested LegH concentrations up to 5000 µg/ml for the 4 hr  
527 incubations. Due to test article precipitation and decreased percent mitotic index, 1000 µg/ml  
528 LegH was the maximum dose evaluated for the 24 hr incubation. Together, these results  
529 demonstrate that LegH Prep is non-mutagenic and non-clastogenic under the *in vitro* conditions  
530 tested.

531         To evaluate the *in vivo* safety profile for potential systemic toxicity, a 28-day feeding  
532 study was conducted in rats in which LegH Prep was administered in the diet. Animals were  
533 monitored for clinical observations, food consumption, body weight, ophthalmology, clinical  
534 pathology, necropsy and histopathology. There were no LegH Prep-dependent effects observed  
535 with the exception of a distinct estrous cycle stage distribution in Group 2 and 4 females at study  
536 termination. Group 2 and 4 females had an increased incidence of the metestrus stage of the  
537 estrous cycle, decreased presence of fluid filled uteri and dilated uterine lumens, and decreased  
538 uterine weight compared to Group 1 and 3 females (Table 10-11). However, the correlation  
539 between estrous cycle stage and reproductive organ weight and pathology for each animal was

540 consistent with published literature on normal healthy rats.<sup>66</sup> Therefore, although the estrous  
541 cycle stage distribution was different between groups, there were no data to suggest an adverse  
542 impact on the health of the female animals; the presence of both new and old ovarian corpora  
543 lutea indicated normal estrous cyclicity.<sup>65</sup> Without evidence of an adverse effect in the female  
544 ovary or uterus pathology, the decrease in relative and absolute uterine weights in Group 2 and 4  
545 females was interpreted to be non-adverse. Moreover, decreased uterine weight is normal for  
546 animals in the metestrus stage of the estrous cycle.<sup>67</sup>

547         An in-depth follow-up 28-day dietary feeding study in female rats was performed with  
548 longitudinal estrous cycle monitoring and evaluation of reproductive organ weights, gross  
549 necropsy, and histopathology. The results demonstrated that LegH Prep had no impact on the  
550 estrous cycle length, distribution, or female reproductive organ health (Table 12-13). Despite  
551 intrinsically normal estrous cycles, different estrous cycle stage distributions were observed  
552 between groups on any given day (Figure 1). This highlights the importance of longitudinal  
553 estrous cycle monitoring to evaluate estrous cyclicity. For example, if the estrous cycle stages  
554 were only monitored on a single day, a completely different conclusion would have been drawn  
555 regarding the test article-effect on estrous cycle if the animals had been analyzed, for example,  
556 on day 18 of the dosing period compared to day 21 (Figure 1). The single day sampling artifact  
557 readily accounts for the increased incidence of metestrus observed in the initial 28-day dietary  
558 feeding study. Moreover, a pathology peer review of the original 28-day study resulted in a  
559 consensus between the study pathologist and review pathologist that LegH Prep did not affect the  
560 estrous cycle.

561         Together, these systemic toxicity and reproductive health feeding studies in rats  
562 established a NOAEL of 750 mg/kg/day LegH for both sexes, which was the maximum dose

563 administered. Collectively these *in vitro* and *in vivo* results establish that LegH Prep, containing  
564 both soy leghemoglobin protein and Pichia proteins from the production host, is safe for its  
565 intended use in ground beef analogue products.

566 Creating safe, delicious plant-based meats to replace animal-derived meats in the diet is  
567 critical to reducing and eventually eliminating the environmental impact of the animal farming  
568 industry. Impossible Foods Inc. has shown that plant-based meat containing up to 0.8% LegH  
569 delivers flavors and aromas that are characteristic of animal-derived meat.<sup>11</sup> This study  
570 established a NOAEL of 750 mg/kg/day LegH, which is over 100 times higher than the 90<sup>th</sup>  
571 percentile EDI. This maximum dose is equivalent to an average sized person (60 kg) consuming  
572 5625g (12 lbs) of plant-based ground beef analogue with 0.8% LegH per day. Thus, LegH Prep  
573 is safe for its intended use in ground beef analogue products.

574

#### 575 **Authorship**

576 RZF, SK, MS and OM designed the experiments; RZF, MS, and PA performed the experiments;  
577 RZF, MS, PA, SK, and OM analyzed the data; RZF, MS, and OM wrote the manuscript.

578

#### 579 **Acknowledgements**

580 We acknowledge ELT and KM for assistance with initial drafting of the manuscript; POB, ELT,  
581 GLY, and JLV for critical evaluation of the manuscript; MP and NH for feedback on study  
582 design; CT for critical review of chromosome aberration test; and HY and PA for analytical  
583 chemistry support.

584

#### 585 **Funding**

586 This work was supported by Impossible Foods Inc., which is developing plant-based meats,  
587 using the LegH preparation that is the subject of this report, to replace today's animal-derived  
588 meats.

589

590 **Conflict of Interest**

591 RZF, PA, and SK are employees of Impossible Foods Inc. The other authors declare no conflict  
592 of interest.

593

594

595 **Figure Legends**

596

597 **Figure 1.** Number of rats in the estrus phase of the estrous cycle for the first 10 rats within  
598 Groups 1 and 4 on each day. Data are from the 28-day dietary study with pre-dosing estrous  
599 cycle determination.

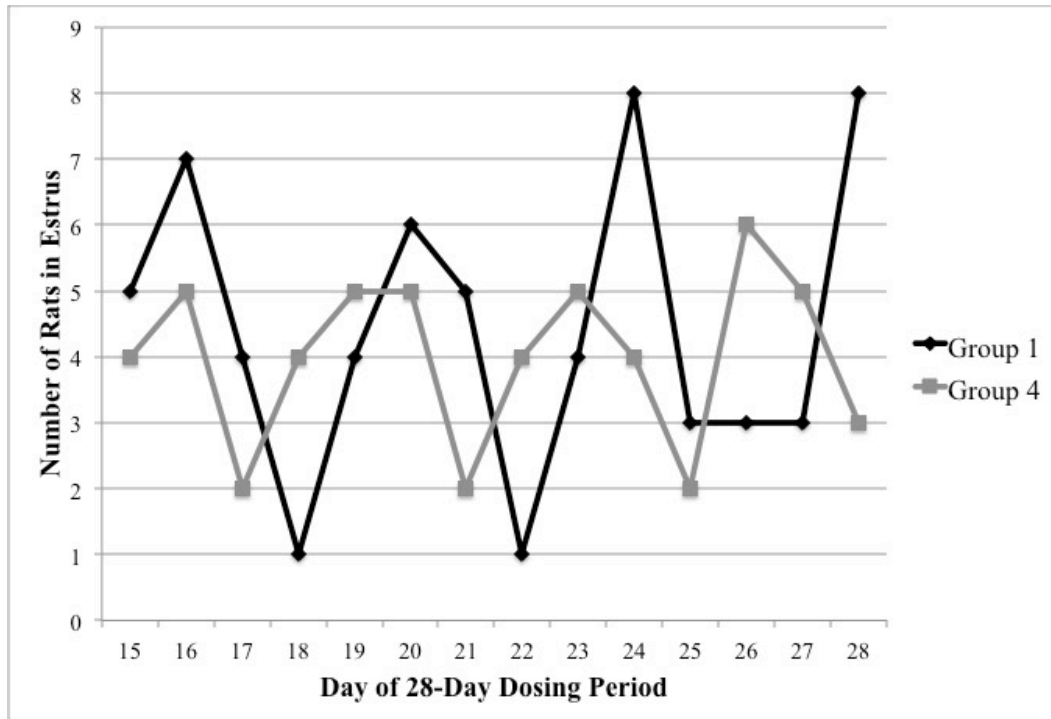

600

601

602

## 603 References

- 604 1. Pimentel D, Pimentel M. Sustainability of meat-based and plant-based diets and the  
605 environment. *Am J Clin Nutr.* 2003;78(3):660S-663S.
- 606 2. Macdiarmid JI, Douglas F, Campbell J. Eating like there's no tomorrow: Public awareness  
607 of the environmental impact of food and reluctance to eat less meat as part of a sustainable  
608 diet. *Appetite.* 2016;96:487-493.
- 609 3. Goodland R. Environmental sustainability in agriculture: diet matters. *Ecol Econ.*  
610 1997;23(3):189-200.
- 611 4. Stehfest E, Bouwman L, van Vuuren DP, den Elzen MGJ, Eickhout B, Kabat P. Climate  
612 benefits of changing diet. *Clim Change.* 2009;95(1):83-102.
- 613 5. de Boer J, Schösler H, Aiking H. "Meatless days" or "less but better"? Exploring strategies  
614 to adapt Western meat consumption to health and sustainability challenges. *Abstr 23rd Eur*  
615 *Child Obes Group ECOG Congr.* 2014;76:120-128.
- 616 6. Shepherd R. Resistance to Changes in Diet. *Proc Nutr Soc.* 2002;61(2):267-272.
- 617 7. Hoek AC, Luning PA, Stafleu A, de Graaf C. Food-related lifestyle and health attitudes of  
618 Dutch vegetarians, non-vegetarian consumers of meat substitutes, and meat consumers.  
619 *Appetite.* 2004;42(3):265-272.
- 620 8. Hoek AC, Luning PA, Weijzen P, Engels W, Kok FJ, de Graaf C. Replacement of meat by  
621 meat substitutes. A survey on person- and product-related factors in consumer acceptance.  
622 *Appetite.* 2011;56(3):662-673.
- 623 9. McIlveen H, Abraham C, Armstrong G. Meat avoidance and the role of replacers. *Nutr*  
624 *Food Sci.* 1999;99(1):29-36.
- 625 10. Schösler H, Boer J de, Boersema JJ. Can we cut out the meat of the dish? Constructing  
626 consumer-oriented pathways towards meat substitution. *Appetite.* 2012;58(1):39-47.
- 627 11. Fraser R, Brown PO, Karr J, Holz-Schietinger C, Cohn E. Methods and compositions for  
628 affecting the flavor and aroma profile of consumables. July 2017.
- 629 12. Hardison R. Hemoglobins from bacteria to man: evolution of different patterns of gene  
630 expression. *J Exp Biol.* 1998;201(Pt 8):1099-1117.
- 631 13. *Iron.* National Institutes of Health, Office of Dietary Supplements; 2016.
- 632 14. Carpenter CE, Mahoney AW. Contributions of heme and nonheme iron to human nutrition.  
633 *Crit Rev Food Sci Nutr.* 1992;31(4):333-367.
- 634 15. Hardison RC. A brief history of hemoglobins: plant, animal, protist, and bacteria. *Proc Natl*  
635 *Acad Sci U S A.* 1996;93(12):5675-5679.

- 636 16. Appleby CA. Leghemoglobin and Rhizobium respiration. *Annu Rev Plant Physiol.*  
637 1984;35(1):443-478.
- 638 17. Gupta KJ, Hebelstrup KH, Mur LAJ, Igamberdiev AU. Plant hemoglobins: Important  
639 players at the crossroads between oxygen and nitric oxide. *FEBS Lett.* 2011;585(24):3843-  
640 3849.
- 641 18. Anderson CR, Jensen EO, LLewellyn DJ, Dennis ES, Peacock WJ. A new hemoglobin  
642 gene from soybean: a role for hemoglobin in all plants. *Proc Natl Acad Sci U S A.*  
643 1996;93(12):5682-5687.
- 644 19. Appleby CA, Bogusz D, Dennis ES, Peacock WJ. A role for haemoglobin in all plant roots?  
645 *Plant Cell Environ.* 1988;11(5):359-367.
- 646 20. Taylor ER, Nie XZ, MacGregor AW, Hill RD. A cereal haemoglobin gene is expressed in  
647 seed and root tissues under anaerobic conditions. *Plant Mol Biol.* 1994;24(6):853-862.
- 648 21. Bogusz D, Appleby CA, Landsmann J, Dennis ES, Trinick MJ, Peacock WJ. Functioning  
649 haemoglobin genes in non-nodulating plants. *Nature.* 1988;331(6152):178-180.
- 650 22. Appleby CA, Tjepkema JD, Trinick MJ. Hemoglobin in a Nonleguminous Plant,  
651 Parasponia: Possible Genetic Origin and Function in Nitrogen Fixation. *Science.*  
652 1983;220(4600):951-953.
- 653 23. Duff SM, Guy PA, Nie X, Durnin DC, Hill RD. Haemoglobin expression in germinating  
654 barley. *Seed Sci Res.* 1998;8(4):431-436.
- 655 24. Lira-Ruan V, Ruiz-Kubli M, Arredondo-Peter R. Expression of non-symbiotic hemoglobin  
656 1 and 2 genes in rice (*Oryza sativa*) embryonic organs. *Commun Integr Biol.*  
657 2011;4(4):457-458.
- 658 25. Bodnar AL. Novel approaches to improving qualities of maize endosperm. 2011.
- 659 26. Hargrove MS, Barry JK, Brucker EA, et al. Characterization of recombinant soybean  
660 leghemoglobin a and apolar distal histidine mutants. *J Mol Biol.* 1997;266(5):1032-1042.
- 661 27. Proulx AK, Reddy MB. Iron bioavailability of hemoglobin from soy root nodules using a  
662 Caco-2 cell culture model. *J Agric Food Chem.* 2006;54(4):1518-1522.
- 663 28. *Agency Response Letter GRAS Notice No. GRN 000204.* United States Food and Drug  
664 Administration, Center for Food Safety and Applied Nutrition, Office of Food Additive  
665 Safety; 2006.
- 666 29. Ahmad M, Hirz M, Pichler H, Schwab H. Protein expression in *Pichia pastoris*: recent  
667 achievements and perspectives for heterologous protein production. *Appl Microbiol*  
668 *Biotechnol.* 2014;98(12):5301-5317.



- 669 30. Aunstrup K, Andresen O, Falch EA, Nielsen TK. Production of microbial enzymes. In:  
670 *Microbial Technology Volume 1, Volume 1*. New York: Academic Press; 1979.
- 671 31. Ciofalo V, Barton N, Kreps J, Coats I, Shanahan D. Safety evaluation of a lipase enzyme  
672 preparation, expressed in *Pichia pastoris*, intended for use in the degumming of edible  
673 vegetable oil. *Regul Toxicol Pharmacol RTP*. 2006;45(1):1-8.
- 674 32. Enzyme Technical Association. *Food Allergen Labeling of Microbially Derived Enzymes*  
675 *Under FALCPA as It Applies to Fermentation Media Raw Materials*.; 2015.
- 676 33. Taylor SL, Baumert JL. *Testing Microbially Derived Enzymes for Potential Allergens From*  
677 *Fermentation Media Raw Materials*. Institute of Agriculture and Natural Resources Food  
678 Allergy Research and Resource Program; 2013.
- 679 34. Bowman SA, Martin CL, Carlson JL, Clemens JC, Lin B-H, Moshfegh AJ. *Retail*  
680 *Commodity Intakes: Mean Amounts of Retail Commodities per Individual, 2007/2008*.  
681 United States Department of Agriculture, Agricultural Research Service; 2013.
- 682 35. Davis CG, Ling B-H. *Factors Affecting U.S. Beef Consumption*. United States Department  
683 of Agriculture; 2005.
- 684 36. McDowell MA, Fryar CD, Ogden CL, Flegal KM. Anthropometric reference data for  
685 children and adults: United States, 2003–2006. *Natl Health Stat Rep*. 2008;(10):1-48.
- 686 37. *Guidance for Industry: Estimating Dietary Intake of Substances in Food*. U.S. Department  
687 of Health and Human Services, Food and Drug Administration, Center for Food Safety and  
688 Applied Nutrition; 2006.
- 689 38. Product Safety Labs. *Soy Leghemoglobin Preparation: Bacterial Reverse Mutation Test*  
690 *(Ames Test)*. PSL Study Number 42759; 2016.
- 691 39. OECD. *OECD Principles on Good Laboratory Practice*. OECD Publishing; 1998.
- 692 40. OECD. *Test No. 471: Bacterial Reverse Mutation Test*. OECD Publishing; 1997.
- 693 41. *Guidance on Genotoxicity Testing and Data Interpretation for Pharmaceuticals Intended*  
694 *for Human Use*. International Conference on Harmonisation of Technical Requirements for  
695 Registration of Pharmaceuticals for Human Use; 2011.
- 696 42. Eurofins Munich. *In Vitro Mammalian Chromosome Aberration Test in Human*  
697 *Lymphocytes with Leghemoglobin*. Eurofins Munich Study Number 160931; 2017.
- 698 43. *Chemikaliengesetz (“Chemicals Act”) of the Federal Republic of Germany*. Vol Appendix  
699 1 to § 19a.; 2013.
- 700 44. OECD. *Test No. 473: In Vitro Mammalian Chromosomal Aberration Test*. OECD  
701 Publishing; 2014.

- 702 45. *Mutagenicity – In Vitro Mammalian Chromosome Aberration Test Council Regulation (EC)*  
703 *No 440/2008 B 10 as Enacted May 30, 2008.*
- 704 46. Product Safety Labs. *Soy Leghemoglobin Preparation: A 14-Day Dietary Study in Rats.*  
705 PSL Study Number 43167; 2016.
- 706 47. OECD. *Test No. 407: Repeated Dose 28-Day Oral Toxicity Study in Rodents.* OECD  
707 Publishing; 2008.
- 708 48. U.S. Department of Health and Human Services, Food and Drug Administration, Center for  
709 Food Safety and Applied Nutrition. *Guidance for Industry and Other Stakeholders*  
710 *Toxicological Principles for the Safety Assessment of Food Ingredients Redbook 2000.;*  
711 2000.
- 712 49. National Research Council (US) Committee for the Update of the Guide for the Care and  
713 Use of Laboratory Animals. *Guide for the Care and Use of Laboratory Animals.* 8th ed.  
714 Washington (DC): National Academies Press (US); 2011.
- 715 50. Product Safety Labs. *Soy Leghemoglobin Preparation: A 28-Day Dietary Study in Rats.*  
716 PSL Study Number 43166; 2017.
- 717 51. OECD. *Test No. 408: Repeated Dose 90-Day Oral Toxicity Study in Rodents.* OECD  
718 Publishing; 1998.
- 719 52. Product Safety Labs. *Soy Leghemoglobin Preparation: An Investigative 28-Day Dietary*  
720 *Study in Rats with a 14-Day Pre-Dosing Estrous Cycle Determination.* PSL Study Number  
721 44856; 2017.
- 722 53. Bartlett MS. Properties of Sufficiency and Statistical Tests. *Proc R Soc Lond Math Phys*  
723 *Eng Sci.* 1937;160(901):268-282.
- 724 54. Dunnett CW. New Tables for Multiple Comparisons with a Control. *Biometrics.*  
725 1964;20(3):482-491.
- 726 55. Dunnett CW. Pairwise Multiple Comparisons in the Unequal Variance Case. *J Am Stat*  
727 *Assoc.* 1980;75(372):796-800.
- 728 56. Kruskal WH, Wallis WA. Use of Ranks in One-Criterion Variance Analysis. *J Am Stat*  
729 *Assoc.* 1952;47(260):583.
- 730 57. Dunn OJ. Multiple Comparisons Using Rank Sums. *Technometrics.* 1964;6(3):241-252.
- 731 58. Levene H. Robust Tests for Equality of Variances. In: *Contributions to Probability and*  
732 *Statistics: Essays in Honor of Harold Hotelling.* Palo Alto: Stanford University Press; 1960.
- 733 59. Shapiro SS, Wilk MB. An analysis of variance test for normality (complete samples).  
734 *Biometrika.* 1965;52(3-4):591-611.

- 735 60. Mortelmans K, Zeiger E. The Ames Salmonella/microsome mutagenicity assay. *Mutat Res.*  
736 2000;455(1-2):29-60.
- 737 61. Gatehouse D. Bacterial Mutagenicity Assays: Test Methods. In: Parry JM, Parry EM, eds.  
738 *Genetic Toxicology: Principles and Methods*. New York, NY: Springer New York;  
739 2012:21-34.
- 740 62. Galloway SM. Cytotoxicity and chromosome aberrations in vitro: experience in industry  
741 and the case for an upper limit on toxicity in the aberration assay. *Environ Mol Mutagen.*  
742 2000;35(3):191-201.
- 743 63. Percy DH, Barthold SW. *Pathology of Laboratory Rodents and Rabbits*. 2nd ed. Ames,  
744 Iowa: Blackwell Pub; 2007.
- 745 64. McInnes EF, ed. *Background Lesions in Laboratory Animals: A Color Atlas*. Edinburgh:  
746 Elsevier; 2012.
- 747 65. Dixon D, Alison R, Bach U, et al. Nonproliferative and proliferative lesions of the rat and  
748 mouse female reproductive system. *J Toxicol Pathol.* 2014;27(3-4 Suppl):1S-107S.
- 749 66. Westwood FR. The Female Rat Reproductive Cycle: A Practical Histological Guide to  
750 Staging. *Toxicol Pathol.* 2008;36(3):375-384.
- 751 67. Astwood EB. CHANGES IN THE WEIGHT AND WATER CONTENT OF THE  
752 UTERUS OF THE NORMAL ADULT RAT. *Am J Physiol -- Leg Content.*  
753 1939;126(1):162-170.
- 754

**Table 1: Number of Revertant Colonies and Mutation Factors Without/With Metabolic Activation (S9) - Ames Test**

| Compound | LegH Dose*<br>(µg/plate)) | TA98                        |             |             |             | TA100                       |              |              |              | TA1535                      |             |             |             | TA1537                      |             |             |             | EC WP2 uvrA                 |             |             |             |
|----------|---------------------------|-----------------------------|-------------|-------------|-------------|-----------------------------|--------------|--------------|--------------|-----------------------------|-------------|-------------|-------------|-----------------------------|-------------|-------------|-------------|-----------------------------|-------------|-------------|-------------|
|          |                           | -S9                         |             | ±S9         |             | -S9                         |              | ±S9          |              | -S9                         |             | ±S9         |             | -S9                         |             | ±S9         |             | -S9                         |             | ±S9         |             |
|          |                           | Mean revertants / plate ±SD |             |             |             | Mean revertants / plate ±SD |              |              |              | Mean revertants / plate ±SD |             |             |             | Mean revertants / plate ±SD |             |             |             | Mean revertants / plate ±SD |             |             |             |
|          |                           | Rep 1                       | Rep 2       | Rep 1       | Rep 2       | Rep 1                       | Rep 2        | Rep 1        | Rep 2        | Rep 1                       | Rep 2       | Rep 1       | Rep 2       | Rep 1                       | Rep 2       | Rep 1       | Rep 2       | Rep 1                       | Rep 2       | Rep 1       | Rep 2       |
| Vehicle  | 0                         | 25<br>±1.5                  | 21<br>±1.5  | 27<br>±4.7  | 26<br>±3.8  | 103<br>±7.8                 | 103<br>±10.3 | 119<br>±9.6  | 120<br>±4.5  | 18<br>±2.1                  | 13<br>±2.1  | 13<br>±2.5  | 11<br>±1.5  | 13<br>±0.6                  | 8<br>±1.0   | 12<br>±4.9  | 12<br>±3.2  | 40<br>±5.5                  | 34<br>±3.8  | 52<br>±10.4 | 41<br>±5.6  |
|          | <b>Mutation Factor</b>    | <b>1.00</b>                 | <b>1.00</b> | <b>1.00</b> | <b>1.00</b> | <b>1.00</b>                 | <b>1.00</b>  | <b>1.00</b>  | <b>1.00</b>  | <b>1.00</b>                 | <b>1.00</b> | <b>1.00</b> | <b>1.00</b> | <b>1.00</b>                 | <b>1.00</b> | <b>1.00</b> | <b>1.00</b> | <b>1.00</b>                 | <b>1.00</b> | <b>1.00</b> | <b>1.00</b> |
| LegH     | 1.58                      | 24<br>±1.7                  | 22<br>±1.5  | 26<br>±2.1  | 25<br>±1.2  | 98<br>±9.5                  | 89<br>4.7    | 106<br>±8.1  | 98<br>±6.5   | 9<br>±2.1                   | 15<br>±2.6  | 11<br>±3.5  | 11<br>±3.6  | 10<br>±2.3                  | 13<br>±4.5  | 14<br>±1.2  | 17<br>±2.5  | 43<br>±8.1                  | 40<br>±7.0  | 40<br>±3.5  | 47<br>±7.2  |
|          | <b>Mutation Factor</b>    | <b>0.96</b>                 | <b>1.05</b> | <b>0.96</b> | <b>0.96</b> | <b>0.95</b>                 | <b>0.86</b>  | <b>0.89</b>  | <b>0.82</b>  | <b>0.5</b>                  | <b>1.15</b> | <b>0.85</b> | <b>1.00</b> | <b>0.77</b>                 | <b>1.63</b> | <b>1.17</b> | <b>1.42</b> | <b>1.08</b>                 | <b>1.18</b> | <b>0.77</b> | <b>1.15</b> |
| LegH     | 5.0                       | 20<br>±0.6                  | 21<br>±6.6  | 23<br>±2.0  | 29<br>±6.1  | 91<br>±3.2                  | 86<br>±7.2   | 109<br>±4.6  | 106<br>±4.0  | 12<br>±5.5                  | 11<br>±2.1  | 14<br>±0.6  | 10<br>±3.6  | 11<br>±3.5                  | 17<br>±6.4  | 14<br>±3.2  | 15<br>±3.5  | 34<br>±7.2                  | 28<br>±7.2  | 38<br>±4.0  | 48<br>±1.0  |
|          | <b>Mutation Factor</b>    | <b>0.80</b>                 | <b>1.00</b> | <b>0.85</b> | <b>1.12</b> | <b>0.88</b>                 | <b>0.83</b>  | <b>0.92</b>  | <b>0.88</b>  | <b>0.67</b>                 | <b>0.85</b> | <b>1.08</b> | <b>0.91</b> | <b>0.85</b>                 | <b>2.13</b> | <b>1.17</b> | <b>1.25</b> | <b>0.85</b>                 | <b>0.82</b> | <b>0.73</b> | <b>1.17</b> |
| LegH     | 15.8                      | 23<br>±4.0                  | 19<br>±2.6  | 28<br>±2.6  | 23<br>±2.0  | 97<br>±14.4                 | 96<br>±14.6  | 102<br>±15.1 | 104<br>±14.0 | 10<br>±1.7                  | 16<br>±4.2  | 13<br>±3.1  | 10<br>±2.6  | 11<br>±0.6                  | 8<br>±2.1   | 14<br>±3.5  | 12<br>±2.6  | 42<br>±7.6                  | 41<br>±7.0  | 53<br>±2.6  | 37<br>±2.6  |
|          | <b>Mutation Factor</b>    | <b>0.92</b>                 | <b>0.90</b> | <b>1.04</b> | <b>0.88</b> | <b>0.94</b>                 | <b>0.93</b>  | <b>0.86</b>  | <b>0.87</b>  | <b>0.56</b>                 | <b>1.23</b> | <b>1.00</b> | <b>0.91</b> | <b>0.85</b>                 | <b>1.00</b> | <b>1.17</b> | <b>1.00</b> | <b>1.05</b>                 | <b>1.21</b> | <b>1.02</b> | <b>0.90</b> |
| LegH     | 50                        | 22<br>±2.1                  | 28<br>±3.5  | 27<br>±2.0  | 22<br>±0.6  | 89<br>±5.1                  | 101<br>±7.0  | 108<br>±8.7  | 110<br>±6.1  | 12<br>±4.0                  | 11<br>±0.6  | 9<br>±1.0   | 10<br>±1.2  | 13<br>±4.0                  | 11<br>±6.2  | 10<br>±2.9  | 8<br>±4.4   | 46<br>±1.5                  | 32<br>±2.3  | 43<br>±10.1 | 44<br>±7.6  |
|          | <b>Mutation Factor</b>    | <b>0.88</b>                 | <b>1.33</b> | <b>1.00</b> | <b>0.85</b> | <b>0.86</b>                 | <b>0.98</b>  | <b>0.91</b>  | <b>0.92</b>  | <b>0.67</b>                 | <b>0.85</b> | <b>0.69</b> | <b>0.91</b> | <b>1.00</b>                 | <b>1.38</b> | <b>0.83</b> | <b>0.67</b> | <b>1.15</b>                 | <b>0.94</b> | <b>0.83</b> | <b>1.07</b> |
| LegH     | 158                       | 20<br>±2.5                  | 21<br>±2.9  | 26<br>±0.6  | 25<br>±4.0  | 98<br>±6.7                  | 94<br>±6.6   | 94<br>±3.1   | 92<br>±11.1  | 12<br>±1.7                  | 13<br>±4.7  | 13<br>±2.3  | 8<br>±3.6   | 11<br>±0.6                  | 8<br>±2.6   | 14<br>±0.6  | 11<br>±1.5  | 45<br>±4.4                  | 31<br>±2.9  | 45<br>±13.3 | 41<br>±0.6  |
|          | <b>Mutation Factor</b>    | <b>0.80</b>                 | <b>1.00</b> | <b>0.96</b> | <b>0.96</b> | <b>0.95</b>                 | <b>0.91</b>  | <b>0.79</b>  | <b>0.77</b>  | <b>0.67</b>                 | <b>1.00</b> | <b>1.00</b> | <b>0.73</b> | <b>0.85</b>                 | <b>1.00</b> | <b>1.17</b> | <b>0.92</b> | <b>1.13</b>                 | <b>0.91</b> | <b>0.87</b> | <b>1.00</b> |
| LegH     | 500                       | 22<br>±2.5                  | 21<br>±2.0  | 25<br>±5.0  | 28<br>±2.3  | 96<br>±5.5                  | 81<br>±11.4  | 99<br>±3.5   | 89<br>±7.5   | 11<br>±7.0                  | 11<br>±4.0  | 11<br>±1.0  | 12<br>±2.6  | 9<br>±0.6                   | 10<br>±3.6  | 8<br>±3.2   | 10<br>±1.0  | 41<br>±11.6                 | 36<br>±9.0  | 57<br>±8.3  | 52<br>±4.0  |
|          | <b>Mutation Factor</b>    | <b>0.88</b>                 | <b>1.00</b> | <b>0.93</b> | <b>1.08</b> | <b>0.93</b>                 | <b>0.79</b>  | <b>0.83</b>  | <b>0.74</b>  | <b>0.61</b>                 | <b>0.85</b> | <b>0.85</b> | <b>1.09</b> | <b>0.69</b>                 | <b>1.25</b> | <b>0.67</b> | <b>0.83</b> | <b>1.03</b>                 | <b>1.06</b> | <b>1.10</b> | <b>1.27</b> |
| LegH     | 1580                      | 26<br>±0.6                  | 22<br>±4.0  | 19<br>±2.1  | 26<br>±6.1  | 97<br>±5.5                  | 95<br>±10.2  | 107<br>±3.2  | 98<br>±7.5   | 15<br>±5.2                  | 7<br>±2.1   | 10<br>±3.8  | 10<br>±2.1  | 7<br>±0.6                   | 12<br>±2.9  | 10<br>±1.7  | 14<br>±6.5  | 46<br>±3.6                  | 32<br>±5.1  | 47<br>±6.7  | 47<br>±3.5  |
|          | <b>Mutation Factor</b>    | <b>1.04</b>                 | <b>1.05</b> | <b>0.70</b> | <b>1.00</b> | <b>0.94</b>                 | <b>0.92</b>  | <b>0.90</b>  | <b>0.82</b>  | <b>0.83</b>                 | <b>0.54</b> | <b>0.77</b> | <b>0.91</b> | <b>0.54</b>                 | <b>1.50</b> | <b>0.83</b> | <b>1.17</b> | <b>1.15</b>                 | <b>0.94</b> | <b>0.90</b> | <b>1.15</b> |
| LegH     | 5000                      | 23<br>±3.5                  | 24<br>±4.6  | 28<br>±4.7  | 30<br>±5.0  | 100<br>±7.0                 | 96<br>±10.0  | 101<br>±9.5  | 111<br>±6.2  | 12<br>±1.2                  | 12<br>±5.3  | 13<br>±3.1  | 11<br>±2.5  | 8<br>±1.5                   | 14<br>±1.0  | 13<br>±3.6  | 16<br>±2.5  | 39<br>±8.0                  | 44<br>±2.1  | 53<br>±5.5  | 39<br>±11.9 |
|          | <b>Mutation Factor</b>    | <b>0.92</b>                 | <b>1.14</b> | <b>1.04</b> | <b>1.15</b> | <b>0.97</b>                 | <b>0.93</b>  | <b>0.85</b>  | <b>0.93</b>  | <b>0.67</b>                 | <b>0.92</b> | <b>1.00</b> | <b>1.00</b> | <b>0.62</b>                 | <b>1.75</b> | <b>1.08</b> | <b>1.33</b> | <b>0.98</b>                 | <b>1.29</b> | <b>1.02</b> | <b>0.95</b> |

n=3 replicate plates

Dash Lines (-): data not applicable

Rep 1 – Average from the main test, which followed the plate incorporation method

Rep 2 – Average from the confirmatory test, which followed the pre-incubation modification of the plate incorporation test

Mutation Factor – Calculated by dividing the mean revertant colony count by the mean revertant colony count for the corresponding concurrent vehicle control group.

\* LegH levels correspond to LegH Prep concentrations of 23.384, 74, 233.84, 740, 2338.4, 7400, 23384, 74000 µg/plate.

**Table 1 (cont.): Number of Revertant Colonies and Mutation Factors Without/With Metabolic Activation (S9) - Ames Test**

| Compound                      | LegH Dose<br>(µg/plate)) | TA98                        |              |                |                | TA100                       |             |                |               | TA1535                      |              |              |              | TA1537                      |               |              |              | EC WP2 uvrA                 |              |              |              |
|-------------------------------|--------------------------|-----------------------------|--------------|----------------|----------------|-----------------------------|-------------|----------------|---------------|-----------------------------|--------------|--------------|--------------|-----------------------------|---------------|--------------|--------------|-----------------------------|--------------|--------------|--------------|
|                               |                          | -S9                         |              | ±S9            |                | -S9                         |             | ±S9            |               | -S9                         |              | ±S9          |              | -S9                         |               | ±S9          |              | -S9                         |              | ±S9          |              |
|                               |                          | Mean revertants / plate ±SD |              |                |                | Mean revertants / plate ±SD |             |                |               | Mean revertants / plate ±SD |              |              |              | Mean revertants / plate ±SD |               |              |              | Mean revertants / plate ±SD |              |              |              |
|                               |                          | Rep 1                       | Rep 2        | Rep 1          | Rep 2          | Rep 1                       | Rep 2       | Rep 1          | Rep 2         | Rep 1                       | Rep 2        | Rep 1        | Rep 2        | Rep 1                       | Rep 2         | Rep 1        | Rep 2        | Rep 1                       | Rep 2        | Rep 1        | Rep 2        |
| Daunomycin <sup>c</sup>       | 6                        | 801<br>±19.9                | 309<br>±9.6  | -              | -              | -                           | -           | -              | -             | -                           | -            | -            | -            | -                           | -             | -            | -            | -                           | -            | -            |              |
| <b>Mutation Factor</b>        |                          | <b>32.04</b>                | <b>14.71</b> |                |                |                             |             |                |               |                             |              |              |              |                             |               |              |              |                             |              |              |              |
| 2-AA <sup>c</sup>             | 10                       | -                           | -            | 2634<br>±157.8 | 2446<br>±165.8 | -                           | -           | 2830<br>±400.0 | 2500<br>±94.7 | -                           | -            | 333<br>±5.7  | 275<br>±3.5  | -                           | -             | 506<br>±50.9 | 381<br>±27.3 | -                           | -            | 113<br>±12.2 | 119<br>±11.0 |
| <b>Mutation Factor</b>        |                          |                             |              | <b>97.56</b>   | <b>94.08</b>   |                             |             | <b>23.78</b>   | <b>20.83</b>  |                             |              | <b>25.62</b> | <b>25.00</b> |                             |               | <b>38.92</b> | <b>31.75</b> |                             |              | <b>2.17</b>  | <b>2.90</b>  |
| Sodium Azide <sup>c</sup>     | 1.5                      | -                           | -            | -              | -              | 505<br>±5.5                 | 524<br>±9.5 | -              | -             | 567<br>±11.8                | 585<br>±32.8 | -            | -            | -                           | -             | -            | -            | -                           | -            | -            | -            |
| <b>Mutation Factor</b>        |                          |                             |              |                |                | <b>4.90</b>                 | <b>5.09</b> |                |               | <b>31.50</b>                | <b>45.00</b> |              |              |                             |               |              |              |                             |              |              |              |
| ICR 191 Acridine <sup>c</sup> | 1                        | -                           | -            | -              | -              | -                           | -           | -              | -             | -                           | -            | -            | -            | 393<br>±20.7                | 5530<br>±95.6 | -            | -            | -                           | -            | -            | -            |
| <b>Mutation Factor</b>        |                          |                             |              |                |                |                             |             |                |               |                             |              |              |              | <b>32.75</b>                | <b>691.25</b> |              |              |                             |              |              |              |
| MMS <sup>c</sup>              | 2.5                      | -                           | -            | -              | -              | -                           | -           | -              | -             | -                           | -            | -            | -            | -                           | -             | -            | -            | 812<br>±7.8                 | 373<br>±25.2 | -            | -            |
| <b>Mutation Factor</b>        |                          |                             |              |                |                |                             |             |                |               |                             |              |              |              |                             |               |              |              | <b>20.30</b>                | <b>10.97</b> |              |              |

n=3 replicate plates

Dash Lines (-): data not applicable

Rep 1 – Average from the main test, which followed the plate incorporation method

Rep 2 – Average from the confirmatory test, which followed the pre-incubation modification of the plate incorporation test

<sup>c</sup> Positive controls

Mutation Factor – Calculated by dividing the mean revertant colony count by the mean revertant colony count for the corresponding concurrent vehicle control group.

**Table 2: Human Peripheral Blood Lymphocytes Treated with LegH Prep – Chromosome Aberration Assay**

| Treatment (w/v)           | S9 Activation | Treatment Time | Mean Mitotic Index | Cells Scored | Cells With Aberrations |                |
|---------------------------|---------------|----------------|--------------------|--------------|------------------------|----------------|
|                           |               |                |                    |              | Including Gaps         | Excluding Gaps |
| <b>Experiment 1 (-S9)</b> |               |                |                    |              |                        |                |
| Control                   | -S9           | 4              | 40                 | 300          | 17                     | 10             |
| LegH 500 (µg/mL)          | -S9           | 4              | 35                 | 300          | 18                     | 12             |
| LegH 1000 (µg/mL)         | -S9           | 4              | 28                 | 300          | 22                     | 13             |
| LegH 2500 (µg/mL)         | -S9           | 4              | 23                 | 300          | 18                     | 12             |
| LegH 5000 (µg/mL)         | -S9           | 4              | 22                 | 300          | 20                     | 5              |
| EMS 900 (µg/mL)           | -S9           | 4              | 25                 | 200          | 37                     | 32             |
| <b>Experiment 1 (+S9)</b> |               |                |                    |              |                        |                |
| Control                   | +S9           | 4              | 38                 | 300          | 23                     | 11             |
| LegH 1000 (µg/mL)         | +S9           | 4              | 42                 | 300          | 22                     | 13             |
| LegH 2500 (µg/mL)         | +S9           | 4              | 32                 | 300          | 15                     | 6              |
| LegH 5000 (µg/mL)         | +S9           | 4              | 40                 | 300          | 15                     | 8              |
| CPA 7.5 (µg/mL)           | +S9           | 4              | 34                 | 200          | 37                     | 31             |
| <b>Experiment 2 (-S9)</b> |               |                |                    |              |                        |                |
| Control                   | -S9           | 24             | 60                 | 300          | 13                     | 7              |
| LegH 100 (µg/mL)          | -S9           | 24             | 52                 | 300          | 18                     | 8              |
| LegH 200 (µg/mL)          | -S9           | 24             | 57                 | 300          | 20                     | 10             |
| LegH 500 (µg/mL)          | -S9           | 24             | 42/P               | 300          | 10                     | 6              |
| LegH 1000 (µg/mL)         | -S9           | 24             | 32/P               | 300          | 10                     | 6              |
| LegH 2000 (µg/mL)         | -S9           | 24             | 16/P               | ND           | ND                     | ND             |
| LegH 3000 (µg/mL)         | -S9           | 24             | 8/P                | ND           | ND                     | ND             |
| LegH 4000 (µg/mL)         | -S9           | 24             | 23/P               | ND           | ND                     | ND             |
| LegH 5000 (µg/mL)         | -S9           | 24             | 25/P               | ND           | ND                     | ND             |
| EMS 400 (µg/mL)           | -S9           | 24             | 29                 | 75           | 43                     | 41             |

ND – Not determined

P - Precipitate observed

<sup>S1</sup> – p <0.05

<sup>S2</sup> – p <0.01

<sup>S3</sup> – p <0.001

**Table 3: Human Peripheral Blood Lymphocytes Treated with LegH Prep – Proliferation Index**

| Treatment<br>(LegH w/v)   | S9<br>Activation | Treatment<br>time (h) | Proliferation<br>Index | Cells in Mitosis Number |    |   |
|---------------------------|------------------|-----------------------|------------------------|-------------------------|----|---|
|                           |                  |                       |                        | 1                       | 2  | 3 |
| <b>Experiment 1 (-S9)</b> |                  |                       |                        |                         |    |   |
| <b>Control</b>            | -S9              | 4                     | 1.16                   | 84                      | 16 | 0 |
| <b>5000 (µg/mL)</b>       | -S9              | 4                     | 1.09                   | 91                      | 9  | 0 |
| <b>Experiment 1 (+S9)</b> |                  |                       |                        |                         |    |   |
| <b>Control</b>            | +S9              | 4                     | 1.12                   | 88                      | 12 | 0 |
| <b>5000 (µg/mL)</b>       | +S9              | 4                     | 1.07                   | 93                      | 7  | 0 |
| <b>Experiment 2 (-S9)</b> |                  |                       |                        |                         |    |   |
| <b>Control</b>            | -S9              | 24                    | 1.56                   | 44                      | 56 | 0 |
| <b>500 (µg/mL)</b>        | -S9              | 24                    | 1.23                   | 77                      | 23 | 0 |
| <b>1000 (µg/mL)</b>       | -S9              | 24                    | 1.12                   | 88                      | 12 | 0 |

<sup>S1</sup> – p <0.05

<sup>S2</sup> – p <0.01

<sup>S3</sup> – p <0.001

**Table 4: Summary of Mean Body Weights and Mean Body Weight Gain – 28-Day Dietary Study**

| Mean Body weight (mg/kg/day) |                |                |                 |                |                 |                |                 |                | Mean Body Weight Gain (mg/kg/day) |               |               |                 |                             |                 |               |                 |               |
|------------------------------|----------------|----------------|-----------------|----------------|-----------------|----------------|-----------------|----------------|-----------------------------------|---------------|---------------|-----------------|-----------------------------|-----------------|---------------|-----------------|---------------|
| LegH Dose Levels             | 0 (mg/kg/day)  |                | 250 (mg/kg/day) |                | 500 (mg/kg/day) |                | 750 (mg/kg/day) |                | LegH Dose Levels                  | 0 (mg/kg/day) |               | 250 (mg/kg/day) |                             | 500 (mg/kg/day) |               | 750 (mg/kg/day) |               |
| Study Day                    | M              | F              | M               | F              | M               | F              | M               | F              | Study Days                        | M             | F             | M               | F                           | M               | F             | M               | F             |
| <b>0</b>                     | 236.4<br>±6.1  | 174.1<br>12.3± | 236.4<br>±6.1   | 174.4<br>±12.6 | 236.7<br>±7.0   | 175.6<br>±11.8 | 236.3<br>±6.7   | 174.3<br>±11.9 | <b>0-7</b>                        | 7.33<br>±1.35 | 3.46<br>±1.03 | 7.60<br>±0.94   | 3.80<br>±0.96               | 7.74<br>±1.40   | 4.06<br>±0.72 | 8.07<br>±1.16   | 3.57<br>±0.61 |
| <b>7</b>                     | 287.7<br>±14.0 | 198.3<br>±14.8 | 289.6<br>±11.1  | 201.0<br>±16.5 | 290.9<br>±14.3  | 240.0<br>±13.3 | 292.8<br>±12.2  | 199.3<br>±10.5 | <b>7-14</b>                       | 6.37<br>±0.77 | 2.93<br>±2.09 | 6.77<br>±1.30   | 2.50<br>±0.75               | 7.24<br>±1.49   | 2.81<br>±0.66 | 6.67<br>±1.13   | 3.14<br>±0.81 |
| <b>14</b>                    | 332.3<br>±16.5 | 218.8<br>±21.9 | 337.0<br>±18.4  | 218.5<br>±19.6 | 341.6<br>±24.2  | 223.7<br>±14.6 | 339.5<br>±18.6  | 221.3<br>±14.3 | <b>14-21</b>                      | 5.84<br>±1.15 | 2.91<br>±1.15 | 5.66<br>±0.91   | 1.51 <sup>S2</sup><br>±0.82 | 6.13<br>±1.12   | 2.16<br>±1.03 | 5.77<br>±0.86   | 2.39<br>±0.96 |
| <b>21</b>                    | 373.2<br>±22.7 | 239.2<br>±24.0 | 376.6<br>±21.4  | 229.1<br>±19.4 | 384.5<br>±31.1  | 238.8<br>±19.4 | 379.9<br>±22.7  | 238.0<br>±13.1 | <b>21-28</b>                      | 3.07<br>±2.06 | 1.51<br>±1.03 | 3.19<br>±0.75   | 2.13<br>±0.85               | 3.67<br>±1.10   | 2.06<br>±0.63 | 3.66<br>±0.47   | 1.53<br>±0.79 |
| <b>28</b>                    | 394.7<br>±28.8 | 249.8<br>±24.0 | 398.9<br>±26.4  | 244.0<br>±23.3 | 410.2<br>±37.2  | 253.2<br>±17.7 | 405.5<br>±24.4  | 248.7<br>±12.4 | <b>0-28</b>                       | 5.65<br>±0.84 | 2.70<br>±0.60 | 5.80<br>±0.83   | 2.49<br>±0.53               | 6.20<br>±1.14   | 2.77<br>±0.30 | 6.04<br>±0.70   | 2.66<br>±0.34 |

n=10 animals/sex/group

M = male

F = female

<sup>S1</sup> – p <0.05

<sup>S2</sup> – p <0.01

<sup>S3</sup> – p <0.001



**Table 5: Summary of Mean Daily Food Consumption – 28-Day Dietary Study**

| Mean Daily Food Consumption (mg/kg/day) |                |                |                 |                |                              |                |                              |                |
|-----------------------------------------|----------------|----------------|-----------------|----------------|------------------------------|----------------|------------------------------|----------------|
| LegH Dose Levels                        | 0 (mg/kg/day)  |                | 250 (mg/kg/day) |                | 500 (mg/kg/day)              |                | 750 (mg/kg/day)              |                |
| Study Day                               | M              | F              | M               | F              | M                            | F              | M                            | F              |
| <b>0-3</b>                              | 18.73<br>±3.35 | 13.43<br>±2.05 | 18.73<br>±1.98  | 12.93<br>±2.21 | 18.80<br>±2.68               | 13.73<br>±1.74 | 19.03<br>±2.99               | 13.70<br>±2.56 |
| <b>3-7</b>                              | 28.03<br>±1.08 | 21.18<br>±1.24 | 28.60<br>±0.52  | 21.23<br>±1.13 | 28.23<br>±2.08               | 21.05<br>±1.31 | 28.63<br>±1.07               | 20.18<br>±0.77 |
| <b>0-7</b>                              | 24.04<br>±1.67 | 17.86<br>±0.98 | 24.37<br>±0.65  | 17.67<br>±1.06 | 24.19<br>±0.94               | 17.91<br>±1.02 | 24.51<br>±1.56               | 17.40<br>±0.82 |
| <b>7-10</b>                             | 26.30<br>±1.31 | 19.33<br>±2.23 | 27.10<br>±0.81  | 18.43<br>±0.54 | 27.80 <sup>s2</sup><br>±1.97 | 19.30<br>±2.26 | 27.90 <sup>s1</sup><br>±0.78 | 18.90<br>±0.96 |
| <b>10-14</b>                            | 26.55<br>±1.17 | 19.55<br>±1.59 | 27.25<br>±0.91  | 20.45<br>±2.02 | 27.88<br>±2.25               | 19.45<br>±1.12 | 27.45<br>±1.03               | 19.08<br>±1.11 |
| <b>7-14</b>                             | 26.44<br>±1.16 | 19.46<br>±1.83 | 27.19<br>±0.84  | 19.59<br>±1.29 | 27.84 <sup>s1</sup><br>±2.12 | 19.39<br>±1.52 | 27.64<br>±0.84               | 19.00<br>±1.02 |
| <b>14-17</b>                            | 25.90<br>±0.89 | 19.27<br>±1.34 | 25.47<br>±1.83  | 19.40<br>±0.76 | 26.33<br>±2.71               | 18.47<br>±1.22 | 26.17<br>±0.82               | 18.73<br>±1.17 |
| <b>17-21</b>                            | 26.38<br>±0.97 | 19.88<br>±1.72 | 26.50<br>±0.77  | 20.08<br>±1.18 | 27.10<br>±2.31               | 19.35<br>±1.52 | 26.93<br>±0.86               | 19.13<br>±0.64 |
| <b>14-21</b>                            | 26.17<br>±0.93 | 19.61<br>±1.53 | 26.06<br>±1.19  | 19.79<br>±0.64 | 26.77<br>±2.42               | 18.97<br>±1.35 | 26.60<br>±0.67               | 18.96<br>±0.61 |
| <b>21-24</b>                            | 21.80<br>±0.77 | 15.90<br>±0.74 | 22.07<br>±1.03  | 16.23<br>±0.68 | 22.27<br>±1.61               | 15.97<br>±0.34 | 22.47<br>±0.66               | 15.63<br>±0.55 |
| <b>24-28</b>                            | 27.70<br>±1.04 | 20.70<br>±1.38 | 28.75<br>±1.21  | 21.33<br>±1.44 | 29.13<br>±1.92               | 21.08<br>±0.91 | 29.18<br>±1.28               | 20.45<br>±0.55 |
| <b>21-28</b>                            | 25.17<br>±0.89 | 18.64<br>±1.09 | 25.89<br>±1.10  | 19.14<br>±0.96 | 26.19<br>±1.73               | 18.89<br>±0.54 | 26.30<br>±0.83               | 18.39<br>±0.32 |
| <b>0-28</b>                             | 25.46<br>±0.91 | 18.89<br>±1.23 | 25.88<br>±0.87  | 19.05<br>±0.81 | 36.25<br>±1.58               | 18.79<br>±1.09 | 26.26<br>±0.90               | 18.44<br>±0.61 |

n=10 animals/sex/group

M=male

F=Female

<sup>s1</sup> – p <0.05

<sup>s2</sup> – p <0.01

<sup>s3</sup> – p <0.001

**Table 6: Summary of Mean Food Efficiency and Mean Daily Dietary Intake of LegH Prep – 28-Day Dietary Study**

| Mean Food Efficiency (mg/kg/day) |                 |                 |                 |                               |                 |                 |                 |                 | Mean Daily Dietary Intake of LegH Prep (mg/kg/day) |             |             |                |                |                 |                 |                  |                  |
|----------------------------------|-----------------|-----------------|-----------------|-------------------------------|-----------------|-----------------|-----------------|-----------------|----------------------------------------------------|-------------|-------------|----------------|----------------|-----------------|-----------------|------------------|------------------|
| LegH Dose Levels                 | 0               |                 | 250             |                               | 500             |                 | 750             |                 | LegH Prep Dose Levels                              | 0           |             | 512            |                | 1024            |                 | 1536             |                  |
| Study Day                        | M               | F               | M               | F                             | M               | F               | M               | F               | Study Days                                         | M           | F           | M              | F              | M               | F               | M                | F                |
| <b>0-7</b>                       | 0.304<br>±0.046 | 0.193<br>±0.055 | 0.312<br>±0.038 | 0.215<br>±0.052               | 0.319<br>±0.051 | 0.226<br>±0.037 | 0.329<br>±0.046 | 0.206<br>±0.038 | <b>0-7</b>                                         | 0.0<br>±0.0 | 0.0<br>±0.0 | 485.4<br>±20.9 | 498.0<br>±43.5 | 966.5<br>±42.5  | 995.9<br>±29.2  | 1459.8<br>±103.0 | 1481.1<br>±115.0 |
| <b>7-14</b>                      | 0.241<br>±0.025 | 0.148<br>±0.093 | 0.248<br>±0.043 | 0.128<br>±0.037               | 0.258<br>±0.041 | 0.146<br>±0.033 | 0.241<br>±0.040 | 0.165<br>±0.040 | <b>7-14</b>                                        | 0.0<br>±0.0 | 0.0<br>±0.0 | 540.5<br>±24.5 | 541.9<br>±49.9 | 1095.9<br>±53.5 | 1064.6<br>±39.2 | 1631.5<br>±78.9  | 1604.6<br>±116.7 |
| <b>14-21</b>                     | 0.223<br>±0.044 | 0.149<br>±0.057 | 0.217<br>±0.022 | 0.077 <sup>S2</sup><br>±0.042 | 0.227<br>±0.026 | 0.112<br>±0.049 | 0.217<br>±0.031 | 0.126<br>±0.052 | <b>14-21</b>                                       | 0.0<br>±0.0 | 0.0<br>±0.0 | 503.2<br>±30.7 | 518.8<br>±53.9 | 1007.2<br>±61.7 | 1015.1<br>±34.3 | 1513.7<br>±81.1  | 1537.2<br>±92.3  |
| <b>21-28</b>                     | 0.121<br>±0.040 | 0.080<br>±0.052 | 0.123<br>±0.032 | 0.111<br>±0.041               | 0.139<br>±0.040 | 0.109<br>±0.033 | 0.139<br>±0.019 | 0.083<br>±0.044 | <b>21-28</b>                                       | 0.0<br>±0.0 | 0.0<br>±0.0 | 495.9<br>±33.2 | 482.4<br>±41.9 | 973.0<br>±49.1  | 994.0<br>±56.0  | 1473.9<br>±92.5  | 1460.2<br>±79.0  |
| <b>0-28</b>                      | 0.222<br>±0.031 | 0.142<br>±0.027 | 0.224<br>±0.028 | 0.131<br>±0.028               | 0.235<br>±0.034 | 0.147<br>±0.011 | 0.230<br>±0.027 | 0.144<br>±0.019 | <b>0-28</b>                                        | 0.0<br>±0.0 | 0.0<br>±0.0 | 478.9<br>±24.7 | 497.8<br>±42.8 | 954.7<br>±36.0  | 983.4<br>±29.0  | 1438.2<br>±78.6  | 1470.4<br>±88.2  |

n=10 animals/sex/group

M=male

F=female

<sup>S1</sup> – p <0.05

<sup>S2</sup> – p <0.01

<sup>S3</sup> – p <0.001

**Table 7: Hematology & Coagulation – 28-Day Dietary Study**

| LegH Dose Levels<br>Parameter | Clinical Pathology - Hematology |                 |                 |                              |                             |                               |                             |                 | Historical Means<br>And Ranges |                     |
|-------------------------------|---------------------------------|-----------------|-----------------|------------------------------|-----------------------------|-------------------------------|-----------------------------|-----------------|--------------------------------|---------------------|
|                               | 0 (mg/kg/day)                   |                 | 250 (mg/kg/day) |                              | 500 (mg/kg/day)             |                               | 750 (mg/kg/day)             |                 | M                              | F                   |
|                               | M                               | F               | M               | F                            | M                           | F                             | M                           | F               |                                |                     |
| <b>RBC</b><br>(x106/mL)       | 7.72<br>± 0.23                  | 7.59<br>± 0.24  | 7.60<br>± 0.34  | 8.01 <sup>S1</sup><br>± 0.38 | 7.61<br>± 0.35              | 7.86<br>± 0.24                | 7.70<br>± 0.27              | 7.63<br>± 0.30  | 8.75<br>5.07-10.04             | 8.26<br>6.99-9.34   |
| <b>HGB</b><br>(g/dL)          | 15.6<br>± 0.3                   | 15.3<br>± 0.5   | 15.4<br>± 0.6   | 16.2 <sup>S1</sup><br>± 0.5  | 15.5<br>± 0.6               | 15.7<br>± 0.4                 | 15.9<br>± 0.4               | 15.5<br>± 0.6   | 15.7<br>10.5-17.4              | 15.4<br>13.4-17.3   |
| <b>HCT</b><br>(%)             | 45.5<br>± 0.9                   | 43.6<br>± 1.2   | 45.1<br>± 1.5   | 45.9 <sup>S1</sup><br>± 1.2  | 45.1<br>± 1.7               | 44.7<br>± 1.3                 | 45.9<br>± 0.8               | 44.0<br>± 1.7   | 46.1<br>34.8-50.6              | 44.8<br>38.0-49.4   |
| <b>MCV</b><br>(fl)            | 58.9<br>± 1.0                   | 57.5<br>± 1.1   | 59.3<br>± 2.3   | 57.4<br>± 2.2                | 59.3<br>± 1.5               | 56.8<br>± 1.2                 | 59.7<br>± 1.9               | 57.7<br>± 2.2   | 52.8<br>47.5-68.6              | 54.3<br>49.9-58.6   |
| <b>MCH</b><br>(pg)            | 20.3<br>± 0.5                   | 20.2<br>± 0.3   | 20.3<br>± 0.9   | 20.2<br>± 0.7                | 20.4<br>± 0.5               | 20.0<br>± 0.5                 | 20.6<br>± 0.7               | 20.3<br>± 0.7   | 17.9<br>15.3-20.7              | 18.7<br>17.0-20.8   |
| <b>MCHC</b><br>(g/dL)         | 34.4<br>± 0.4                   | 35.2<br>± 0.7   | 34.2<br>± 0.4   | 35.3<br>± 0.3                | 34.4<br>± 0.3               | 35.2<br>± 0.4                 | 34.5<br>± 0.5               | 35.2<br>± 0.5   | 34.0<br>30.1-36.7              | 34.5<br>32.5-36.5   |
| <b>RDW</b><br>(%)             | 12.1<br>± 0.3                   | 11.3<br>± 0.4   | 12.5<br>± 0.5   | 11.3<br>± 0.5                | 12.5<br>± 0.3               | 11.2<br>± 0.3                 | 12.3<br>± 0.5               | 11.5<br>± 0.5   | 13.3<br>11.3-31.2              | 11.6<br>10.1-13.1   |
| <b>PLT</b><br>(x103/mL)       | 1160<br>± 121                   | 1190<br>± 108   | 1202<br>± 69    | 1176<br>± 127                | 1171<br>± 76                | 1230<br>± 115                 | 1227<br>± 185               | 1229<br>± 114   | 990<br>404-1799                | 1013<br>448-1594    |
| <b>WBC</b><br>(x103/mL)       | 13.00<br>± 1.33                 | 10.08<br>± 1.70 | 14.41<br>± 2.67 | 11.87<br>± 1.75              | 11.13<br>± 1.82             | 11.59<br>± 3.35               | 13.45<br>± 4.41             | 10.19<br>± 3.72 | 11.94<br>2.75-22.23            | 7.66<br>2.41-17.04  |
| <b>ANEU</b><br>(x103/mL)      | 1.91<br>± 0.67                  | 1.48<br>± 0.30  | 1.99<br>± 0.43  | 1.56<br>± 0.58               | 1.75<br>± 0.43              | 1.68<br>± 0.85                | 1.57<br>± 0.62              | 1.54<br>± 1.10  | 2.11<br>0.53-9.39              | 1.08<br>0.31-4.08   |
| <b>ALYM</b><br>(x103/mL)      | 10.49<br>± 1.17                 | 8.15<br>± 1.58  | 11.79<br>± 2.48 | 9.74<br>± 1.43               | 8.86<br>± 1.70              | 9.29<br>± 2.71                | 11.29<br>± 4.15             | 8.21<br>± 2.88  | 9.12<br>1.47-20.32             | 6.16<br>1.79-12.84  |
| <b>AMON</b><br>(x103/mL)      | 0.31<br>± 0.10                  | 0.25<br>± 0.15  | 0.34<br>± 0.11  | 0.29<br>± 0.06               | 0.28<br>± 0.05              | 0.33<br>± 0.15                | 0.30<br>± 0.10              | 0.22<br>± 0.14  | 0.35<br>0.09-0.93              | 0.20<br>0.03-0.56   |
| <b>AEOS</b><br>(x103/mL)      | 0.12<br>± 0.04                  | 0.11<br>± 0.03  | 0.13<br>± 0.08  | 0.13<br>± 0.04               | 0.11<br>± 0.04              | 0.15<br>± 0.05                | 0.11<br>± 0.05              | 0.12<br>± 0.06  | 0.17<br>0.00-0.88              | 0.13<br>0.04-0.84   |
| <b>ABAS</b><br>(x103/mL)      | 0.09<br>± 0.03                  | 0.04<br>± 0.01  | 0.09<br>± 0.04  | 0.07 <sup>S1</sup><br>± 0.03 | 0.07<br>± 0.02              | 0.06<br>± 0.03                | 0.10<br>± 0.06              | 0.05<br>± 0.04  | 0.06<br>0.00-0.27              | 0.03<br>0.00-0.15   |
| <b>ALUC</b><br>(x103/mL)      | 0.08<br>± 0.03                  | 0.05<br>± 0.02  | 0.08<br>± 0.03  | 0.07<br>± 0.02               | 0.06<br>± 0.02              | 0.07<br>± 0.03                | 0.08<br>± 0.04              | 0.05<br>± 0.04  | 0.11<br>0.00-0.47              | 0.06<br>0.00-0.26   |
| <b>ARET</b><br>(x103/mL)      | 232.6<br>± 31.2                 | 205.8<br>± 33.9 | 235.8<br>± 40.7 | 182.4<br>± 32.9              | 246.3<br>± 24.1             | 169.1 <sup>S1</sup><br>± 30.9 | 243.8<br>± 41.1             | 184.2<br>± 33.7 | 219.5<br>98.6-1913.0           | 164.6<br>27.7-277.2 |
| <b>PT</b><br>(sec)            | 10.7<br>± 0.3                   | 10.0<br>± 0.2   | 10.7<br>± 0.4   | 9.8<br>± 0.2                 | 10.6<br>± 0.2               | 10.0<br>± 0.3                 | 10.6<br>± 0.2               | 9.8<br>± 0.2    | 10.53<br>9.5-12.1              | 9.9<br>9.2-10.7     |
| <b>APTT</b><br>(sec)          | 20.2<br>± 2.4                   | 21.9<br>± 2.5   | 23.8<br>± 5.3   | 20.0<br>± 3.1                | 24.9 <sup>S1</sup><br>± 6.9 | 20.8<br>± 5.0                 | 24.9 <sup>S1</sup><br>± 6.9 | 19.4<br>± 1.9   | 19.86<br>13.5-54.8             | 19.0<br>13.2-48.5   |

n=10 animals/sex/group

M=male

F=female

<sup>S1</sup> – p <0.05

<sup>S2</sup> – p <0.01

<sup>S3</sup> – p <0.001

**Table 8: Serum Chemistry – 28-Day Dietary Study**

| LegH Dose Levels<br>Parameter | Clinical Pathology – Serum Chemistry |                |                 |                              |                              |                              |                 |                           | Historical Means<br>And Ranges |                      |
|-------------------------------|--------------------------------------|----------------|-----------------|------------------------------|------------------------------|------------------------------|-----------------|---------------------------|--------------------------------|----------------------|
|                               | 0 (mg/kg/day)                        |                | 250 (mg/kg/day) |                              | 500 (mg/kg/day)              |                              | 750 (mg/kg/day) |                           | M                              | F                    |
|                               | M                                    | F              | M               | F                            | M                            | F                            | M               | F                         |                                |                      |
| <b>AST</b><br>(U/L)           | 73<br>± 8                            | 69<br>± 6      | 76<br>± 9       | 69<br>± 10                   | 79<br>± 7                    | 64<br>± 8                    | 78<br>± 8       | 65<br>± 6                 | 95<br>52-514                   | 77<br>46-460         |
| <b>ALT</b><br>(U/L)           | 29<br>± 4                            | 25<br>± 4      | 28<br>± 4       | 26<br>± 5                    | 28<br>± 3                    | 25<br>± 6                    | 30<br>± 4       | 27<br>± 5                 | 39<br>18-290                   | 33<br>13-283         |
| <b>SDH</b><br>(U/L)           | 8.2<br>± 1.4                         | 8.7<br>± 2.2   | 8.1<br>± 1.7    | 8.1<br>± 1.2                 | 8.4<br>± 2.4                 | 8.0<br>± 0.9                 | 8.0<br>± 1.4    | 9.9<br>± 2.5              | 9.1<br>0.0-126.0               | 8.0<br>0.2-42.7      |
| <b>ALKP</b><br>(U/L)          | 183<br>± 24                          | 137<br>± 16    | 216<br>± 29     | 107 <sup>S1</sup><br>± 19    | 216<br>± 44                  | 121<br>± 29                  | 205<br>± 42     | 108 <sup>S1</sup><br>± 25 | 93<br>43-183                   | 54<br>17-179         |
| <b>BILI</b><br>(mg/dL)        | 0.17<br>± 0.02                       | 0.18<br>± 0.02 | 0.17<br>± 0.02  | 0.19<br>± 0.02               | 0.18<br>± 0.02               | 0.20<br>± 0.02               | 0.18<br>± 0.02  | 0.19<br>± 0.03            | 0.16<br>0.09-0.26              | 0.18<br>0.10-0.28    |
| <b>BUN</b><br>(mg/dL)         | 10<br>± 1                            | 12<br>± 2      | 11<br>± 1       | 11<br>± 1                    | 10<br>± 1                    | 12<br>± 2                    | 11<br>± 2       | 12<br>± 1                 | 13<br>8-24                     | 14<br>7-24           |
| <b>CREA</b><br>(mg/dL)        | 0.22<br>± 0.01                       | 0.28<br>± 0.02 | 0.23<br>± 0.02  | 0.26<br>± 0.02               | 0.23<br>± 0.02               | 0.27<br>± 0.03               | 0.21<br>± 0.02  | 0.26<br>± 0.03            | 0.29<br>0.16-0.48              | 0.35<br>0.21-0.53    |
| <b>CHOL</b><br>(mg/dL)        | 76<br>± 16                           | 85<br>± 11     | 73<br>± 27      | 95<br>± 19                   | 72<br>± 14                   | 98<br>± 19                   | 67<br>± 12      | 94<br>± 22                | 79<br>34-145                   | 89<br>35-225         |
| <b>TRIG</b><br>(mg/dL)        | 66<br>± 17                           | 37<br>± 6      | 67<br>± 13      | 38<br>± 9                    | 67<br>± 17                   | 46<br>± 15                   | 68<br>± 26      | 35<br>± 8                 | 87<br>18-196                   | 52<br>15-265         |
| <b>GLUC</b><br>(mg/dL)        | 95<br>± 12                           | 118<br>± 15    | 100<br>± 9      | 103 <sup>S1</sup><br>± 10    | 102<br>± 13                  | 104 <sup>S1</sup><br>± 10    | 98<br>± 8       | 110<br>± 14               | 123<br>68-256                  | 120<br>82-174        |
| <b>TP</b><br>(g/dL)           | 6.0<br>± 0.2                         | 6.4<br>± 0.3   | 6.1<br>± 0.2    | 6.7<br>± 0.4                 | 6.2<br>± 0.2                 | 6.8<br>± 0.3                 | 6.0<br>± 0.2    | 6.7<br>± 0.4              | 6.3<br>5.3-7.4                 | 7.0<br>5.7-8.5       |
| <b>ALB</b><br>(g/dL)          | 3.1<br>± 0.1                         | 3.5<br>± 0.2   | 3.2<br>± 0.1    | 3.7<br>± 0.2                 | 3.3 <sup>S1</sup><br>± 0.1   | 3.7<br>± 0.2                 | 3.2<br>± 0.1    | 3.6<br>± 0.3              | 3.3<br>2.8-4.0                 | 3.8<br>.1-5.0        |
| <b>GLOB</b><br>(g/dL)         | 2.9<br>± 0.1                         | 2.9<br>± 0.1   | 2.8<br>± 0.2    | 3.1<br>± 0.2                 | 2.9<br>± 0.1                 | 3.1 <sup>S1</sup><br>± 0.2   | 2.8<br>± 0.2    | 3.0<br>± 0.1              | 3.0<br>2.2-3.9                 | 3.2<br>2.1-4.8       |
| <b>CALC</b><br>(mg/dL)        | 10.4<br>± 0.2                        | 10.5<br>± 0.3  | 10.4<br>± 0.2   | 10.9 <sup>S1</sup><br>± 0.3  | 10.4<br>± 0.2                | 11.0 <sup>S1</sup><br>± 0.3  | 10.5<br>± 0.2   | 10.7<br>± 0.4             | 10.2<br>8.1-11.8               | 10.5<br>9.0-12.1     |
| <b>IPHS</b><br>(mg/dL)        | 8.6<br>± 0.4                         | 7.1<br>± 0.5   | 8.7<br>± 0.4    | 7.8<br>± 0.6                 | 8.8<br>± 0.9                 | 7.6<br>± 0.4                 | 8.6<br>± 0.4    | 7.1<br>± 0.8              | 6.6<br>4.5-9.0                 | 5.3<br>2.6-7.8       |
| <b>NA</b><br>(mmol/L)         | 140.5<br>± 4.2                       | 140.3<br>± 1.1 | 142.1<br>± 0.6  | 140.6<br>±                   | 141.1<br>± 0.7               | 140.3<br>± 0.7               | 141.7<br>± 0.8  | 140.2<br>± 1.1            | 142.6<br>127.6-168.8           | 141.2<br>126.3-163.6 |
| <b>K</b><br>(mmol/L)          | 5.03<br>± 0.25                       | 4.56<br>± 0.33 | 5.19<br>± 0.26  | 4.63<br>± 0.38               | 5.55 <sup>S1</sup><br>± 0.61 | 4.72<br>± 0.21               | 5.10<br>± 0.25  | 4.74<br>± 0.38            | 5.35<br>3.97-8.46              | 4.54<br>3.37-7.07    |
| <b>CL</b><br>(mmol/L)         | 100.8<br>± 2.4                       | 102.6<br>± 1.2 | 102.0<br>± 1.0  | 101.3 <sup>S1</sup><br>± 1.4 | 101.6<br>± 0.8               | 101.1 <sup>S1</sup><br>± 1.0 | 101.7<br>± 1.2  | 102.1<br>± 1.1            | 103.5<br>91.9-121.5            | 103.3<br>92.8-119.1  |

n=10 animals/sex/group

M=male

F=female

<sup>S1</sup> – p <0.05

<sup>S2</sup> – p <0.01

<sup>S3</sup> – p <0.001

**Table 9: Urinalysis – 28-Day Dietary Study**

| LegH Dose Levels    | Clinical Pathology – Urinalysis |                  |                  |                  |                  |                  |                  |                  | Historical Means And Ranges |                      |
|---------------------|---------------------------------|------------------|------------------|------------------|------------------|------------------|------------------|------------------|-----------------------------|----------------------|
|                     | 0 (mg/kg/day)                   |                  | 250 (mg/kg/day)  |                  | 500 (mg/kg/day)  |                  | 750 (mg/kg/day)  |                  | M                           | F                    |
| Parameter           | M                               | F                | M                | F                | M                | F                | M                | F                | M                           | F                    |
| <b>UVOL (mL)</b>    | 11.7<br>± 8.2                   | 7.8<br>± 6.4     | 11.5<br>± 9.8    | 6.8<br>± 5.1     | 12.3<br>± 7.3    | 6.5<br>± 3.0     | 14.3<br>± 7.7    | 6.6<br>± 4.1     | 7.3<br>0.3-36.0             | 5.4<br>0.1-39.0      |
| <b>pH</b>           | 6.5<br>± 0.3                    | 6.4<br>± 0.4     | 6.5<br>± 0.4     | 6.2<br>± 0.4     | 6.6<br>± 0.4     | 6.6<br>± 0.6     | 6.6<br>± 0.4     | 6.5<br>± 0.6     | 6.4<br>5.0-8.5              | 6.5<br>5.0-8.5       |
| <b>SG</b>           | 1.027<br>± 0.019                | 1.037<br>± 0.027 | 1.027<br>± 0.015 | 1.035<br>± 0.023 | 1.026<br>± 0.015 | 1.028<br>± 0.011 | 1.024<br>± 0.019 | 1.030<br>± 0.013 | 1.052<br>1.007-1.100        | 1.047<br>1.009-1.100 |
| <b>URO (EU/dL)</b>  | 0.03<br>± 0.03                  | 0.2<br>± 0.0     | 0.2<br>± 0.0     | 0.2<br>± 0.0     | 0.3<br>± 0.3     | 0.2<br>± 0.0     | 0.2<br>± 0.0     | 0.3<br>± 0.3     | 0.3<br>0.2-1.0              | 0.3<br>0.2-1.0       |
| <b>UMTP (mg/dL)</b> | 104<br>± 49                     | 43<br>± 34       | 241<br>± 265     | 41<br>± 25       | 124<br>± 80      | 34<br>± 12       | 111<br>± 97      | 44<br>± 30       | 213<br>18-1330              | 92<br>6-7400         |

n=10 animals/sex/group

M=male

F=female

<sup>s1</sup> – p <0.05

<sup>s2</sup> – p <0.01

<sup>s3</sup> – p <0.001

**Table 10: Summary of Mean Terminal Body Weights and Organ Weights – 28-Day Dietary Study**

| LegH Dose Levels<br>Parameter | Terminal Body and Organ Weights (g) |                   |                   |                               |                   |                   |                   |                               |
|-------------------------------|-------------------------------------|-------------------|-------------------|-------------------------------|-------------------|-------------------|-------------------|-------------------------------|
|                               | 0 (mg/kg/day)                       |                   | 250 (mg/kg/day)   |                               | 500 (mg/kg/day)   |                   | 750 (mg/kg/day)   |                               |
|                               | M                                   | F                 | M                 | F                             | M                 | F                 | M                 | F                             |
| <b>Terminal BW</b>            | 367.5<br>±25.3                      | 229.2<br>±22.3    | 372.5<br>±23.8    | 225.6<br>±22.7                | 384.0<br>±33.4    | 236.3<br>±14.5    | 379.3<br>±21.4    | 233.8<br>±11.9                |
| <b>Adrenal</b>                | 0.0654<br>±0.0068                   | 0.0717<br>±0.0067 | 0.0655<br>±0.0112 | 0.0713<br>±0.0089             | 0.0593<br>±0.0116 | 0.0664<br>±0.0092 | 0.0672<br>±0.0098 | 0.0737<br>±0.0093             |
| <b>Brain</b>                  | 2.141<br>±0.095                     | 2.007<br>±0.093   | 2.143<br>±0.110   | 1.976<br>±0.099               | 2.186<br>±0.140   | 2.046<br>±0.077   | 2.152<br>±0.105   | 2.021<br>±0.049               |
| <b>Epididymides</b>           | 1.032<br>±0.123                     | -                 | 1.088<br>±0.083   | -                             | 1.035<br>±0.131   | -                 | 1.008<br>±0.100   | -                             |
| <b>Heart</b>                  | 1.195<br>±0.104                     | 0.840<br>±0.092   | 1.254<br>±0.121   | 0.830<br>±0.057               | 1.272<br>±0.113   | 0.850<br>±0.034   | 1.219<br>±0.088   | 0.848<br>±0.065               |
| <b>Kidneys</b>                | 2.641<br>±0.297                     | 1.752<br>±0.164   | 2.678<br>±0.219   | 1.820<br>±0.177               | 2.789<br>±0.246   | 1.769<br>±0.140   | 2.800<br>±0.241   | 1.815<br>±0.101               |
| <b>Liver</b>                  | 11.218<br>±1.657                    | 7.156<br>±0.720   | 11.182<br>±0.691  | 7.636<br>±1.037               | 12.317<br>±1.804  | 7.338<br>±0.512   | 12.093<br>±1.452  | 7.763<br>±0.548               |
| <b>Ovaries-Oviduct</b>        | -                                   | 0.1309<br>±0.0173 | -                 | 0.172<br>±0.0172              | -                 | 0.1231<br>±0.0143 | -                 | 0.1364<br>±0.0150             |
| <b>Spleen</b>                 | 0.831<br>±0.125                     | 0.498<br>±0.088   | 0.813<br>±0.107   | 0.518<br>±0.119               | 0.769<br>±0.053   | 0.507<br>±0.068   | 0.809<br>±0.105   | 0.513<br>±0.060               |
| <b>Testes</b>                 | 3.148<br>±0.531                     | -                 | 3.381<br>±0.292   | -                             | 3.266<br>±0.251   | -                 | 3.272<br>±0.246   | -                             |
| <b>Thymus</b>                 | 0.5205<br>±0.1595                   | 0.4343<br>±0.0998 | 0.5661<br>±0.1162 | 0.4654<br>±0.0741             | 0.5466<br>±0.1185 | 0.4762<br>±0.0967 | 0.5276<br>±0.1097 | 0.5218<br>±0.1127             |
| <b>Uterus</b>                 | -                                   | 0.727<br>±0.247   | -                 | 0.457 <sup>S2</sup><br>±0.061 | -                 | 0.615<br>±0.276   | -                 | 0.490 <sup>S1</sup><br>±0.057 |

n=10 animals/sex/group

M=male

F=female

<sup>S1</sup> – p <0.05

<sup>S2</sup> – p <0.01

<sup>S3</sup> – p <0.001

**Table 11: Summary of Mean Relative Organ-to-Body Weights – 28-Day Dietary Study**

| Organ-to-Body Weight Ratios (g) |                   |                   |                   |                               |                   |                   |                   |                               |
|---------------------------------|-------------------|-------------------|-------------------|-------------------------------|-------------------|-------------------|-------------------|-------------------------------|
| LegH Dose Levels                | 0 (mg/kg/day)     |                   | 250 (mg/kg/day)   |                               | 500 (mg/kg/day)   |                   | 750 (mg/kg/day)   |                               |
| Parameter                       | M                 | F                 | M                 | F                             | M                 | F                 | M                 | F                             |
| <b>Adrenal / TBW</b>            | 0.1781<br>±0.0165 | 0.3139<br>±0.0265 | 0.1766<br>±0.0328 | 0.3168<br>±0.0336             | 0.1540<br>±0.0253 | 0.2812<br>±0.0372 | 0.1773<br>±0.0264 | 0.3157<br>±0.0399             |
| <b>Brain / TBW</b>              | 5.846<br>±0.411   | 8.801<br>±0.545   | 5.766<br>±0.355   | 8.828<br>±0.852               | 5.722<br>±0.497   | 8.692<br>±0.686   | 5.682<br>±0.294   | 8.664<br>±0.492               |
| <b>Epididymides / TBW</b>       | 2.8075<br>±0.2682 | -                 | 2.9351<br>±0.3125 | -                             | 2.7030<br>±0.3143 | -                 | 2.6712<br>±0.3544 | -                             |
| <b>Heart / TBW</b>              | 3.251<br>±0.151   | 3.665<br>±0.189   | 3.362<br>±0.151   | 3.692<br>±0.171               | 3.315<br>±0.128   | 3.605<br>±0.178   | 3.214<br>±0.149   | 3.625<br>±0.163               |
| <b>Kidneys / TBW</b>            | 7.184<br>±0.610   | 7.657<br>±0.412   | 7.199<br>±0.541   | 8.094<br>±0.639               | 7.274<br>±0.421   | 7.505<br>±0.657   | 7.387<br>±0.560   | 7.783<br>±0.602               |
| <b>Liver / TBW</b>              | 30.549<br>±4.348  | 31.278<br>±2.212  | 30.052<br>±1.405  | 33.819<br>±2.693              | 31.962<br>±2.654  | 31.158<br>±2.883  | 31.839<br>±3.559  | 33.269<br>±2.772              |
| <b>Ovaries-Oviduct / TBW</b>    | -                 | 0.5727<br>±0.0669 | -                 | 0.5635<br>±0.0474             | -                 | 0.5222<br>±0.0643 | -                 | 0.5835<br>±0.0581             |
| <b>Spleen / TBW</b>             | 2.256<br>±0.255   | 2.171<br>±0.300   | 2.199<br>±0.391   | 2.284<br>±0.384               | 2.012<br>±0.184   | 2.149<br>±0.291   | 2.139<br>±0.312   | 2.191<br>±0.206               |
| <b>Testes / TBW</b>             | 8.549<br>±1.201   | -                 | 9.108<br>±0.971   | -                             | 8.564<br>±0.970   | -                 | 8.657<br>±0.885   | -                             |
| <b>Thymus / TBW</b>             | 1.4134<br>±0.4037 | 1.8863<br>±0.3463 | 1.5209<br>±0.3105 | 2.0742<br>±0.3287             | 1.4171<br>±0.2319 | 2.0184<br>±0.4057 | 1.3939<br>±0.2919 | 2.2362<br>±0.4918             |
| <b>Uterus / TBW</b>             | -                 | 3.159<br>±0.949   | -                 | 2.060 <sup>S2</sup><br>±0.452 | -                 | 2.579<br>±1.063   | -                 | 2.103 <sup>S2</sup><br>±0.277 |

n=10 animals/sex/group

M=male

F=female

<sup>S1</sup> – p <0.05

<sup>S2</sup> – p <0.01

<sup>S3</sup> – p <0.001

**Table 12: Estrus Cycles – 28-Day Dietary Study with Pre-Dosing Estrous Cycle Determination**

| LegH Dose Levels  | Number of Estrus Cycles |                 |                 |                 |
|-------------------|-------------------------|-----------------|-----------------|-----------------|
|                   | 0 (mg/kg/day)           | 250 (mg/kg/day) | 500 (mg/kg/day) | 750 (mg/kg/day) |
| <b>Pre-test</b>   | 2.3                     | 2.4             | 2.3             | 2.1             |
| <b>0-13</b>       | ±0.5                    | ±0.6            | ±0.6            | ±0.5            |
| <b>Study Days</b> | 2.3                     | 1.9             | 2.1             | 2.1             |
| <b>29-42</b>      | ±0.5                    | ±0.5            | ±0.3            | ±0.4            |

n= 15 animals/group

<sup>s1</sup> – p <0.05

<sup>s2</sup> – p <0.01

<sup>s3</sup> – p <0.001



**Table 13: Summary of Mean Terminal Body and Organ Weights and Organ Relative Weights– 28-Day Dietary Study with Pre-Dosing Estrous Cycle Determination**

| Mean Terminal Body and Organ Weights and Organ Relative Weights (g) |                  |                  |                  |                  |                  |                  |                  |                  |
|---------------------------------------------------------------------|------------------|------------------|------------------|------------------|------------------|------------------|------------------|------------------|
| LegH Dose Levels                                                    | 0 (mg/kg/day)    |                  | 250 (mg/kg/day)  |                  | 500 (mg/kg/day)  |                  | 750 (mg/kg/day)  |                  |
| Parameter                                                           | Mean             | Relative         | Mean             | Relative         | Mean             | Relative         | Mean             | Relative         |
| <b>Terminal BW</b>                                                  | 249.9<br>±21.8   | -                | 253.1 ±<br>23.1  | -                | 253.3 ±<br>22.9  | -                | 259.0 ±<br>29.6  | -                |
| <b>Ovaries-</b>                                                     | 0.1311 ±         | 0.5270 ±         | 0.1343 ±         | 0.5325 ±         | 0.1234 ±         | 0.4886 ±         | 0.1370 ±         | 0.5332 ±         |
| <b>Oviduct</b>                                                      | 0.0174           | 0.0733           | 0.0209           | 0.0772           | 0.0128           | 0.0467           | 0.0156           | 0.0667           |
| <b>Uterus</b>                                                       | 0.604 ±<br>0.221 | 2.412 ±<br>0.841 | 0.547 ±<br>0.102 | 2.166 ±<br>0.390 | 0.570 ±<br>0.162 | 2.276 ±<br>0.731 | 0.703 ±<br>0.223 | 2.745 ±<br>0.957 |

n=15 animals/group
